# Supplementary material for: Risk factors for violence against women in high-prevalence settings: a mixed-methods systematic review and meta-synthesis
Source: PubMed Central journal article supplement (PMC8928330; doi:10.1136/bmjgh-2021-007704), 2022-03-16
Supplement: bmjgh-2021-007704supp001.pdf [file bmjgh-2021-007704supp001.pdf]

**Supplementary material:**

Risk factors for violence against women in high-prevalence settings: A mixed methods systematic review and meta-synthesis

---

**Contents**

Table 1: Search strategy for risk factors of VAW in the highest prevalence settings

Table 2: Search strings

Table 3: Inclusion criteria

Table 4: Risk factor template

Table 5: Criteria for assessing fatal flaws in study design

Table 6: All included records, by study

Table 7: Quality assessment

**Supplementary material:**

Risk factors for violence against women in high-prevalence settings: A mixed methods systematic review and meta-synthesis

**Table 1: Search strategy for risk factors of VAW in the highest prevalence settings: [#2 AND #3 AND #4] + [#1 AND #2 AND #4 AND #5]**

|                                                                                                                                                                                                                                                                                                   | Concept 1                                                                                                                                                                     | Concept 2                                                                                                                                                                                                                                                                        | Concept 3                                                                                                                                                                                                                                                                                                                                        | Concept 4                                                                                                                                                                                                                                                                                                                                                                                                                                     | Concept 5                                                                     |
|---------------------------------------------------------------------------------------------------------------------------------------------------------------------------------------------------------------------------------------------------------------------------------------------------|-------------------------------------------------------------------------------------------------------------------------------------------------------------------------------|----------------------------------------------------------------------------------------------------------------------------------------------------------------------------------------------------------------------------------------------------------------------------------|--------------------------------------------------------------------------------------------------------------------------------------------------------------------------------------------------------------------------------------------------------------------------------------------------------------------------------------------------|-----------------------------------------------------------------------------------------------------------------------------------------------------------------------------------------------------------------------------------------------------------------------------------------------------------------------------------------------------------------------------------------------------------------------------------------------|-------------------------------------------------------------------------------|
| <b>Key concepts</b>                                                                                                                                                                                                                                                                               | <b>(1) Violence against women</b>                                                                                                                                             | <b>(2) Types of violence</b>                                                                                                                                                                                                                                                     | <b>(3) High-prevalence settings</b>                                                                                                                                                                                                                                                                                                              | <b>(4) Risk analysis</b>                                                                                                                                                                                                                                                                                                                                                                                                                      | <b>(5) Global</b>                                                             |
| <b>Free text terms / natural language terms</b><br>(synonyms, UK/US terminology, medical/laymen's terms, acronyms/abbreviations, drug brands, more narrow search terms)<br><br><i>Consider: phrase searching, proximity operators, truncation, wildcards, field qualification (e.g. textword)</i> | "violence against women"<br>"gender-based violence"<br>"gender violence"<br>"gender-associated violence"<br>"gender-related violence"<br>"women's health"<br>"women's rights" | "intimate partner violence" [MeSH]<br>"domestic violence" [MeSH]<br>"spouse abuse" [MeSH]<br>"battered women" [MeSH]<br>"family violence"<br>"partner abuse"<br>maltreatment<br>"marital rape"<br>"forced sex"<br>"non-partner sexual violence"<br>killings<br>"forced marriage" | Equatorial Guinea<br>Afghanistan<br>Vanuatu<br>Solomon Islands<br>Kiribati<br>Democratic Republic of the Congo<br>Liberia<br>Timor-Leste<br>Gabon<br>Cameroon<br>Fiji<br>Uganda<br>Tanzania<br>Burundi<br>Sierra Leone<br>Bangladesh<br>Bolivia<br>Micronesia<br>Zambia<br>Sao Tome and Principe<br>Central African Republic<br>Tuvalu<br>Angola | "risk factor" [MeSH]<br>"socioeconomic factors" [MeSH]<br>"social determinants of health" [MeSH]<br>"risk marker"<br>predictor<br>pathway<br>correlate*<br>driver<br><br><u>Specific risk factors:</u><br>education<br>age<br>alcohol<br>"social norm"<br>attitude<br>"substance use"<br>"employment status"<br>"child abuse"<br>ethnicity<br>married<br>religion<br>"male authority"<br>disability<br>"mental health"<br>conflict<br>poverty | global<br>multinational<br>multi country<br>"cross national"<br>international |

**Supplementary material:**

Risk factors for violence against women in high-prevalence settings: A mixed methods systematic review and meta-synthesis

|  | Concept 1 | Concept 2 | Concept 3 | Concept 4                                                                                                                                                                                                                                                                                                                                                                                    | Concept 5 |
|--|-----------|-----------|-----------|----------------------------------------------------------------------------------------------------------------------------------------------------------------------------------------------------------------------------------------------------------------------------------------------------------------------------------------------------------------------------------------------|-----------|
|  |           |           |           | "gender inequality"<br><u>Risk factors added after first round search</u><br>"microcredit participation"<br>"HIV status"<br>"witnessing violence"<br>"natural disaster"<br>"food insecurity"<br>parity<br>"sex work"<br>infidelity<br>polygamy<br>"duration of marriage"<br>income<br>dowry<br>autonomy<br>empowerment<br>"circumstances of first sex"<br>"media exposure"<br>"peer network" |           |

**Supplementary material:****Risk factors for violence against women in high-prevalence settings: A mixed methods systematic review and meta-synthesis****Table 2: Search strings**

| Database          | Search string (second round search highlighted)                                                                                                                                                                                                                                                                                                                                                                                                                                                                                                                                                                                                                                                                                                                                                                                                                                                                                                                                                                                                                                                                                                                                                                                                                                                                                                                                                                                                                                                                                                                                                                                                                                                                                                                                                                                                                                                                                                                                                                                                                                                                                                                                                                                                                                                                                                                                                                                                                                                                                                                                                                                                                                                                                                                                                                                                                                                                                                                                                                                                                                                                                                                                                                                                                                                                                                               | Results (#)                                                                                                                               |
|-------------------|---------------------------------------------------------------------------------------------------------------------------------------------------------------------------------------------------------------------------------------------------------------------------------------------------------------------------------------------------------------------------------------------------------------------------------------------------------------------------------------------------------------------------------------------------------------------------------------------------------------------------------------------------------------------------------------------------------------------------------------------------------------------------------------------------------------------------------------------------------------------------------------------------------------------------------------------------------------------------------------------------------------------------------------------------------------------------------------------------------------------------------------------------------------------------------------------------------------------------------------------------------------------------------------------------------------------------------------------------------------------------------------------------------------------------------------------------------------------------------------------------------------------------------------------------------------------------------------------------------------------------------------------------------------------------------------------------------------------------------------------------------------------------------------------------------------------------------------------------------------------------------------------------------------------------------------------------------------------------------------------------------------------------------------------------------------------------------------------------------------------------------------------------------------------------------------------------------------------------------------------------------------------------------------------------------------------------------------------------------------------------------------------------------------------------------------------------------------------------------------------------------------------------------------------------------------------------------------------------------------------------------------------------------------------------------------------------------------------------------------------------------------------------------------------------------------------------------------------------------------------------------------------------------------------------------------------------------------------------------------------------------------------------------------------------------------------------------------------------------------------------------------------------------------------------------------------------------------------------------------------------------------------------------------------------------------------------------------------------------------|-------------------------------------------------------------------------------------------------------------------------------------------|
| PUBMED/<br>CINAHL | <p>(1) (((((((((((("domestic violence"[MeSH Terms]) OR ("intimate partner violence"[MeSH Terms]) OR ("spouse abuse"[MeSH Terms]) OR ("battered women"[MeSH Terms]) OR (family violence)) OR (partner abuse)) OR (maltreatment)) OR (marital rape)) OR (forced sex)) OR (non-partner sexual violence)) OR (honour killings)) OR (forced marriage) AND (2000:2021[pdat])) AND (((((((((((((((equatorial guinea) or (afghanistan) or (vanuatu) or (solomon islands) or (kiribati) or (democratic republic of the congo) or (liberia) or (timor-leste) or (gabon) or (cameroon) or (fiji) or (uganda) or (tanzania) or (burundi) or (sierra leone) or (bangladesh)) or (bolivia) or (micronesia) or (zambia) or (sao tome and principe) or (central african republic) or (tuvalu) or (angola) AND (2000:2021[pdat])) AND (((((((((((((((((((((((("socioeconomic factors"[MeSH Terms]) OR ("risk factors"[MeSH Terms]) OR ("social determinants of health"[MeSH Terms]) OR (risk marker)) OR (predictor)) OR (pathway)) OR (correlate*)) OR (driver)) OR (education)) OR (age)) OR (alcohol)) OR (social norm)) OR (attitude)) OR (substance use)) OR (employment status)) OR (child abuse)) OR (jealousy)) OR (ethnicity)) OR (married)) OR (religion)) OR (male authority)) OR (poverty)) OR (disability)) OR (mental health)) OR (gender inequality)) OR (armed conflict) OR (microcredit participation)) OR (HIV status)) OR (witnessing violence)) OR (natural disaster)) OR (food insecurity)) OR (parity)) OR (sex work)) OR (infidelity)) OR (polygamy)) OR (duration of marriage)) OR (income)) OR (dowry)) OR (autonomy) OR (empowerment)) OR (circumstances of first sex)) OR (media exposure)) OR (peer network) AND (2000:2021[pdat]))</p> <p>(2) (((("violence against women"[All Fields]) OR ("gender based violence"[All Fields]) OR ("gender violence"[All Fields]) AND (2000:2021[pdat])) AND (((("global"[All Fields]) OR (multinational)) OR ("cross national"[All Fields]) OR ("multi country"[All Fields]) OR (international) AND (2000:2021[pdat])) AND (((((((((((((((((((((((("socioeconomic factors"[MeSH Terms]) OR ("risk factors"[MeSH Terms]) OR ("social determinants of health"[MeSH Terms]) OR (risk marker)) OR (predictor)) OR (pathway)) OR (correlate*)) OR (driver)) OR (education)) OR (age)) OR (alcohol)) OR (social norm)) OR (attitude)) OR (substance use)) OR (employment status)) OR (child abuse)) OR (ethnicity)) OR (married)) OR (religion)) OR (male authority)) OR (poverty)) OR (disability)) OR (mental health)) OR (gender inequality)) OR (armed conflict) OR (microcredit participation)) OR (HIV status)) OR (witnessing violence)) OR (natural disaster)) OR (food insecurity)) OR (parity)) OR (sex work)) OR (infidelity)) OR (polygamy)) OR (duration of marriage)) OR (income)) OR (dowry)) OR (autonomy) OR (empowerment)) OR (circumstances of first sex)) OR (media exposure)) OR (peer network) AND (2000:2021[pdat])) AND (((((((((((("domestic violence"[MeSH Terms]) OR ("intimate partner violence"[MeSH Terms]) OR ("spouse abuse"[MeSH Terms]) OR ("battered women"[MeSH Terms]) OR (family violence)) OR (partner abuse)) OR (maltreatment)) OR (marital rape)) OR (forced sex)) OR (non-partner sexual violence)) OR (honour killings)) OR (forced marriage) AND (2000:2021[pdat]))</p> | <p>PUBMED results = (1)997 + (2)555 = 1,552 [Search date 05/01/21]</p> <p>CINAHL results = (1)301 + (2)0 = 301 [Search date 05/01/21]</p> |

**Supplementary material:****Risk factors for violence against women in high-prevalence settings: A mixed methods systematic review and meta-synthesis**

| Database                                                                                | Search string (second round search highlighted)                                                                                                                                                                                                                                                                                                                                                                                                                                                                                                                                                                                                                                                                                                                                                                                                                                                                                                                                                                                                                                                                                                                                                                                                                                                                                                                                                                                                                                               | Results (#)                                                                                                                                                                                                                                                                                   |
|-----------------------------------------------------------------------------------------|-----------------------------------------------------------------------------------------------------------------------------------------------------------------------------------------------------------------------------------------------------------------------------------------------------------------------------------------------------------------------------------------------------------------------------------------------------------------------------------------------------------------------------------------------------------------------------------------------------------------------------------------------------------------------------------------------------------------------------------------------------------------------------------------------------------------------------------------------------------------------------------------------------------------------------------------------------------------------------------------------------------------------------------------------------------------------------------------------------------------------------------------------------------------------------------------------------------------------------------------------------------------------------------------------------------------------------------------------------------------------------------------------------------------------------------------------------------------------------------------------|-----------------------------------------------------------------------------------------------------------------------------------------------------------------------------------------------------------------------------------------------------------------------------------------------|
| PROQUEST<br>Middle East and North Africa/ Latin America and Iberia/ East and South Asia | <p>(1) "violence against women" or "gender-based violence" or "gender violence"</p> <p>(2) "intimate partner violence" or "domestic violence" or "family violence" or "partner abuse" or "spous* abuse" or "battered women" or maltreatment or "marital rape" or "forced sex" or "non-partner sexual violence" or "hono* killings" or "forced marriage"</p> <p>(3) "equatorial guinea" or afghanistan or vanuatu or "solomon islands" or Kiribati or "democratic republic of the congo" or Liberia or timor-leste or gabon or Cameroon or fiji or Uganda or tanzania or burundi or "sierra leone" or bangladesh or bolivia or micronesia or zambia/ or "sao tome" or "central african republic" or tuvalu or angola</p> <p>(4) "risk marker" or "risk factor" or predictor or correlate or driver or "socioeconomic factors" or "social determinants" or age or alcohol or "social norm" or attitude or employment or "child abuse" or married or religion or "male authority" or disability or "mental health" or conflict or poverty or "gender inequality" or "microcredit participation" or "HIV status" or "witnessing violence" or "natural disaster" or "food insecurity" or "parity" or "sex work" or "infidelity" or "polygamy" or "duration of marriage" or "income" or "dowry" or "autonomy" or "empowerment" or "circumstances of first sex" or "media exposure" or "peer network"</p> <p>(5) global or multinational or "multi country" or "cross national" or international</p> | <p>MIDDLE EAST NORTH AFRICA results = (2,3,4)456 + (1,2,4,5)461 = 917 [Search date 05/01/21]</p> <p>EAST AND SOUTH ASIA results = (2,3,4)121 + (1,2,4,5)139 = 260 [Search date 06/01/21]</p> <p>LATIN AMERICA AND IBERIA results = (2,3,4)161 + (1,3,4,5)386 = 547 [Search date 05/01/21]</p> |
| WEB OF SCIENCE                                                                          | <p>(1) ("intimate partner violence" OR "domestic violence" OR "family violence" OR "partner abuse" OR "spous* abuse" OR "battered women" OR maltreatment OR "marital rape" OR "forced sex" OR "non-partner sexual violence" OR "hono* killings" OR "forced marriage" ) AND ("equatorial guinea" OR afghanistan OR vanuatu OR "solomon islands" OR kiribati OR "democratic republic of the congo" OR liberia OR timor-leste OR gabon OR cameroon OR fiji OR uganda OR tanzania OR burundi OR "sierra leone" OR bangladesh OR bolivia OR micronesia OR zambia OR "sao tome" OR "central african republic" OR tuvalu OR angola OR kenya ) AND ( "risk marker" OR "risk factor" OR predictor OR correlate OR driver OR "socioeconomic factors" OR "social determinants" OR age OR alcohol OR "social norm" OR attitude OR employment OR "child</p>                                                                                                                                                                                                                                                                                                                                                                                                                                                                                                                                                                                                                                                | <p>Web of Science results = (1)1,247 + (2)1,035 = 2,282</p>                                                                                                                                                                                                                                   |

**Supplementary material:****Risk factors for violence against women in high-prevalence settings: A mixed methods systematic review and meta-synthesis**

| Database                | Search string (second round search highlighted)                                                                                                                                                                                                                                                                                                                                                                                                                                                                                                                                                                                                                                                                                                                                                                                                                                                                                                                                                                                                                                                                                                                                                                                                                                                                                                                                                                                                                                                                                                                                                                                                                                                                                                                                                      | Results (#)                                                                                                                                                |
|-------------------------|------------------------------------------------------------------------------------------------------------------------------------------------------------------------------------------------------------------------------------------------------------------------------------------------------------------------------------------------------------------------------------------------------------------------------------------------------------------------------------------------------------------------------------------------------------------------------------------------------------------------------------------------------------------------------------------------------------------------------------------------------------------------------------------------------------------------------------------------------------------------------------------------------------------------------------------------------------------------------------------------------------------------------------------------------------------------------------------------------------------------------------------------------------------------------------------------------------------------------------------------------------------------------------------------------------------------------------------------------------------------------------------------------------------------------------------------------------------------------------------------------------------------------------------------------------------------------------------------------------------------------------------------------------------------------------------------------------------------------------------------------------------------------------------------------|------------------------------------------------------------------------------------------------------------------------------------------------------------|
|                         | <p>abuse" OR married OR religion OR "male authority" OR disability OR "mental health" OR conflict OR poverty OR "gender inequality" OR "microcredit participation" OR "HIV status" OR "witnessing violence" OR "natural disaster" OR "food insecurity" OR parity OR "sex work" OR infidelity OR polygamy OR "duration of marriage" OR income OR dowry OR autonomy OR empowerment OR "circumstances of first sex" OR "media exposure" OR "peer network" )</p> <p>(2) ("violence against women" or "gender-based violence" or "gender violence") AND ("intimate partner violence" OR "domestic violence" OR "family violence" OR "partner abuse" OR "spous* abuse" OR "battered women" OR maltreatment OR "marital rape" OR "forced sex" OR "non-partner sexual violence" OR "hono* killings" OR "forced marriage" ) AND ( "risk marker" OR "risk factor" OR predictor OR correlate OR driver OR "socioeconomic factors" OR "social determinants" OR age OR alcohol OR "social norm" OR attitude OR employment OR "child abuse" OR married OR religion OR "male authority" OR disability OR "mental health" OR conflict OR poverty OR "gender inequality" OR "microcredit participation" OR "HIV status" OR "witnessing violence" OR "natural disaster" OR "food insecurity" OR parity OR "sex work" OR infidelity OR polygamy OR "duration of marriage" OR income OR dowry OR autonomy OR empowerment OR "circumstances of first sex" OR "media exposure" OR "peer network" ) AND (global or multinational or "multi country" or "cross national" or international)</p>                                                                                                                                                                                                                               |                                                                                                                                                            |
| EMBASE / PSYINFO (Ovid) | <p>(1) violence against women/ or gender-based violence/ or gender violence.mp. [mp=title, abstract, heading word, drug trade name, original title, device manufacturer, drug manufacturer, device trade name, keyword, floating subheading word, candidate term word]</p> <p>(2) intimate partner violence/ or domestic violence/ or family violence/ or partner abuse/ or spous* abuse/ or battered women/ or maltreatment/ or marital rape/ or forced sex/ or non-partner sexual violence/ or hono* killings/ or forced marriage.mp. [mp=title, abstract, heading word, drug trade name, original title, device manufacturer, drug manufacturer, device trade name, keyword, floating subheading word, candidate term word]</p> <p>(3) equatorial guinea/ or afghanistan/ or vanuatu/ or solomon islands/ or kiribati/ or democratic republic of the congo/ or liberia/ or timor-leste/ or gabon/ or cameroon/ or fiji/ or uganda/ or tanzania/ or burundi/ or sierra leone/ or bangladesh/ or bolivia/ or micronesia/ or zambia/ or sao tome/ or central african republic/ or tuvalu/ or angola.mp. [mp=title, abstract, heading word, drug trade name, original title, device manufacturer, drug manufacturer, device trade name, keyword, floating subheading word, candidate term word]</p> <p>(4) risk marker/ or risk factor/ or predictor/ or correlate/ or driver/ or socioeconomic factors/ or social determinants/ or age/ or alcohol/ or social norm/ or attitude/ or employment/ or child abuse/ or married/ or religion/ or male authority/ or disability/ or mental health/ or conflict/ or poverty/ or gender inequality/ or microcredit participation/ or HIV status/ or witnessing violence/ or natural disaster/ or food insecurity/ or parity/ or sex work/ or infidelity/</p> | <p>EMBASE results = (2,3,4)346 + (1,2,4,5)8 = 354 [Search date 06/01/21]</p> <p>PsychInfo results = (2,3,4)21 + (1,3,4,5)2 = 23 [Search date 06/01/21]</p> |

**Supplementary material:**

Risk factors for violence against women in high-prevalence settings: A mixed methods systematic review and meta-synthesis

| Database | Search string (second round search highlighted)                                                                                                                                                                                                                                                                                                                                                                                                                                                                                                                                                                                                    | Results (#) |
|----------|----------------------------------------------------------------------------------------------------------------------------------------------------------------------------------------------------------------------------------------------------------------------------------------------------------------------------------------------------------------------------------------------------------------------------------------------------------------------------------------------------------------------------------------------------------------------------------------------------------------------------------------------------|-------------|
|          | <p>or polygamy/ or duration of marriage/ or income/ or dowry/ or autonomy/ or empowerment/ or circumstances of first sex/ or media exposure/ or peer network.mp. [mp=title, abstract, heading word, drug trade name, original title, device manufacturer, drug manufacturer, device trade name, keyword, floating subheading word, candidate term word]</p> <p>(5) global/ or multinational/ or multi country/ or cross national/ or international*.mp. [mp=title, abstract, heading word, drug trade name, original title, device manufacturer, drug manufacturer, device trade name, keyword, floating subheading word, candidate term word]</p> |             |

**Supplementary material:****Risk factors for violence against women in high-prevalence settings: A mixed methods systematic review and meta-synthesis****Table 3: Inclusion criteria**

|                                                         | <b>Inclusion criteria</b>                                                                                                                                                                                                                                                                                                                                                                                                                                                                                                                   | <b>Exclusion criteria</b>                                                                                                                                                                                |
|---------------------------------------------------------|---------------------------------------------------------------------------------------------------------------------------------------------------------------------------------------------------------------------------------------------------------------------------------------------------------------------------------------------------------------------------------------------------------------------------------------------------------------------------------------------------------------------------------------------|----------------------------------------------------------------------------------------------------------------------------------------------------------------------------------------------------------|
| <b>Population:</b> women survivors/ men as perpetrators | Individuals identifying as women (survivors of violence) or men (perpetrators of violence), including transgender women and men.                                                                                                                                                                                                                                                                                                                                                                                                            | <ul style="list-style-type: none"> <li>- Children or adolescents under 18 years old</li> <li>- Male victims of violence</li> </ul>                                                                       |
| <b>Outcome:</b> violence against women                  | Violence against women as the outcome including “any act of gender-based violence that results in, or is <u>likely to result in</u> , physical, sexual or psychological harm or suffering to women, <u>including threats</u> of such acts, coercion or arbitrary deprivation of liberty, <u>whether occurring in public or in private life.</u> ”                                                                                                                                                                                           | <ul style="list-style-type: none"> <li>- Mental health outcomes</li> <li>- Human trafficking</li> <li>- Modern slavery</li> <li>- Female genital mutilation/cutting</li> <li>- Child marriage</li> </ul> |
| <b>Type of study:</b> reporting on primary data         | Any publication reporting original data (peer reviewed, PhD theses or grey literature)                                                                                                                                                                                                                                                                                                                                                                                                                                                      | <ul style="list-style-type: none"> <li>- Opinion pieces and editorials</li> <li>- MSc dissertations/theses</li> <li>- policy papers not reporting original data</li> <li>- general reports</li> </ul>    |
| <b>Study location:</b> High prevalence countries        | Global studies of violence against women without a focus on any specific country<br>Studies taking place in high prevalence countries including: <ul style="list-style-type: none"> <li>- Equatorial Guinea</li> <li>- Afghanistan</li> <li>- Vanuatu</li> <li>- Solomon Islands</li> <li>- Kiribati</li> <li>- Democratic Republic of the Congo</li> <li>- Liberia</li> <li>- Timor-Leste</li> <li>- Gabon</li> <li>- Cameroon</li> <li>- Fiji</li> <li>- Uganda</li> <li>- Tanzania</li> <li>- Burundi</li> <li>- Sierra Leone</li> </ul> | Studies focused on countries not on the included country list                                                                                                                                            |



**Supplementary material:****Risk factors for violence against women in high-prevalence settings: A mixed methods systematic review and meta-synthesis**

---

|  |                                                                                                                                                                                                                           |  |
|--|---------------------------------------------------------------------------------------------------------------------------------------------------------------------------------------------------------------------------|--|
|  | <ul style="list-style-type: none"><li>- Bangladesh</li><li>- Bolivia</li><li>- Micronesia</li><li>- Zambia</li><li>- Sao Tome and Principe</li><li>- Central African Republic</li><li>- Tuvalu</li><li>- Angola</li></ul> |  |
|--|---------------------------------------------------------------------------------------------------------------------------------------------------------------------------------------------------------------------------|--|

**Supplementary material:****Risk factors for violence against women in high-prevalence settings: A mixed methods systematic review and meta-synthesis****Table 4: Risk factor template**

| <b>Risk factor</b>        | <b>Concepts captured by term</b>                                                                                                           | <b>Selection procedure</b>                                                                                                                                                                                                                                 |
|---------------------------|--------------------------------------------------------------------------------------------------------------------------------------------|------------------------------------------------------------------------------------------------------------------------------------------------------------------------------------------------------------------------------------------------------------|
| education                 | individual level of education; relative spousal education                                                                                  | Selected a-priori based on previous systematic reviews and search strategies.                                                                                                                                                                              |
| age                       | individual age; relative spousal age; age at marriage                                                                                      |                                                                                                                                                                                                                                                            |
| alcohol                   | individual alcohol (mis)use; alcohol use before sex; alcohol use before/during violence                                                    |                                                                                                                                                                                                                                                            |
| social norm               | social norms related to the use of violence and gender roles                                                                               |                                                                                                                                                                                                                                                            |
| attitude                  | justification, normalisation and acceptance of violence                                                                                    |                                                                                                                                                                                                                                                            |
| substance use             | individual substance (mis)use; substance use before sex; substance use before violence                                                     |                                                                                                                                                                                                                                                            |
| employment status         | individual employment status; unemployment; job type                                                                                       |                                                                                                                                                                                                                                                            |
| child abuse               | experiences of any type of abuse during childhood                                                                                          |                                                                                                                                                                                                                                                            |
| ethnicity                 | identification with an ethnic group; discrimination based on ethnic group identification                                                   |                                                                                                                                                                                                                                                            |
| married                   | marital status (married, single, cohabiting, informal relationship, divorced, widowed)                                                     |                                                                                                                                                                                                                                                            |
| religion                  | identification with a religious group; discrimination based on religious group identification                                              |                                                                                                                                                                                                                                                            |
| male authority            | male (partner, in-laws, other family members, manager, client) controlling behaviour                                                       |                                                                                                                                                                                                                                                            |
| disability                | disability status; disability stigma and discrimination                                                                                    |                                                                                                                                                                                                                                                            |
| mental health             | mental health illnesses (e.g. depression, anxiety, PTSD); mental health stigma and discrimination                                          |                                                                                                                                                                                                                                                            |
| armed conflict            | residing in conflict zone; experience of violence during conflict; participation in violence during conflict; displacement due to conflict |                                                                                                                                                                                                                                                            |
| poverty                   | low socioeconomic status; wealth index                                                                                                     | Iteratively added to the risk factor template based on screening of papers retrieved from the first round of searching. Risk factors were labelled based on database searching to determine most commonly used term for each risk factor, also considering |
| gender inequality         | unequal gender norms; gender disparities (e.g. income, education); sexism and discrimination                                               |                                                                                                                                                                                                                                                            |
| microcredit participation | participation in microcredit programmes; NGO membership                                                                                    |                                                                                                                                                                                                                                                            |
| HIV status                | HIV status discordance; HIV seropositivity; HIV stigma and discrimination                                                                  |                                                                                                                                                                                                                                                            |
| witnessing violence       | witnessing parental IPV; witnessing violence during conflict; witnessing environmental violence                                            |                                                                                                                                                                                                                                                            |
| natural disaster          | environmental shocks (e.g. draught, cyclone)                                                                                               |                                                                                                                                                                                                                                                            |
| food insecurity           | experiences of lack of food and hunger                                                                                                     |                                                                                                                                                                                                                                                            |
| parity                    | number of children                                                                                                                         |                                                                                                                                                                                                                                                            |
| sex work                  | transactional sex; sex work stigma and discrimination                                                                                      |                                                                                                                                                                                                                                                            |
| infidelity                | extra-marital sex; adultery                                                                                                                |                                                                                                                                                                                                                                                            |
| polygamy                  | polygyny; multiple wives/partners; experience of being a co-wife                                                                           |                                                                                                                                                                                                                                                            |
| duration of marriage      | length of marriage/relationship                                                                                                            |                                                                                                                                                                                                                                                            |
| income                    | individual income level; relative spousal income                                                                                           |                                                                                                                                                                                                                                                            |
| dowry                     | dowry practices; bride price practices                                                                                                     |                                                                                                                                                                                                                                                            |
| autonomy                  | women's decision-making power                                                                                                              |                                                                                                                                                                                                                                                            |
| empowerment               | women's empowerment (including economic empowerment)                                                                                       |                                                                                                                                                                                                                                                            |

**Supplementary material:**Risk factors for violence against women in high-prevalence settings: A mixed methods systematic review and meta-synthesis

---

|                            |                                            |             |
|----------------------------|--------------------------------------------|-------------|
| circumstances of first sex | forced first sex; age at sexual initiation | MeSH terms. |
| media exposure             | TV/radio/phone ownership; reads newspaper  |             |
| peer network               | peer group influence; peer network norms   |             |

**Supplementary material:**

Risk factors for violence against women in high-prevalence settings: A mixed methods systematic review and meta-synthesis

**Table 5: Criteria for assessing fatal flaws in study design**

| <b>Criteria for assessing fatal flaws across study designs</b>                                        |                          |
|-------------------------------------------------------------------------------------------------------|--------------------------|
| Are the aims and objectives of the research clearly stated?                                           | <input type="checkbox"/> |
| Is the research design clearly specified and appropriate for the aims and objectives of the research? | <input type="checkbox"/> |
| Do the researchers provide a clear account of the process by which their findings were reproduced?    | <input type="checkbox"/> |
| Do the researchers display enough data to support their interpretations and conclusions?              | <input type="checkbox"/> |
| Is the method of analysis appropriate and adequately explicated?                                      | <input type="checkbox"/> |
| Additional comments:                                                                                  |                          |

**Reference:** Dixon-Woods, M., Cavers, D., Agarwal, S., Annandale, E., Arthur, A., Harvey, J., Hsu, R., Katbamna, S., Olsen, R., Smith, L. and Riley, R., 2006. Conducting a critical interpretive synthesis of the literature on access to healthcare by vulnerable groups. *BMC medical research methodology*, 6(1), pp.1-13.

**Supplementary material:****Risk factors for violence against women in high-prevalence settings: A mixed methods systematic review and meta-synthesis****Table 6:** All included records, by study

| Study name/design                                                                                | Reference                                                                                                                                                                                                                                                          | Focus                                                             | VAW type(s)                     | Perpetrator(s)                   | Highest level of analysis | Sample          |
|--------------------------------------------------------------------------------------------------|--------------------------------------------------------------------------------------------------------------------------------------------------------------------------------------------------------------------------------------------------------------------|-------------------------------------------------------------------|---------------------------------|----------------------------------|---------------------------|-----------------|
| <b>Afghanistan</b>                                                                               |                                                                                                                                                                                                                                                                    |                                                                   |                                 |                                  |                           |                 |
| <b>DHS 2015</b><br>Quantitative;<br>cross-sectional                                              | Qamar, M., Harris, M. A., & Tustin, J. L. (2020). The Association Between Child Marriage and Domestic Violence in Afghanistan. <i>Journal of Interpersonal Violence</i> , online.                                                                                  | Child marriage and IPV experience among women.                    | Physical, sexual, psychological | Partner                          | Individual/relational     | Women n= 21,324 |
| <b>Women for Women Trial</b><br>Quantitative;<br>cross-sectional                                 | Jewkes, R., Corboz, J., & Gibbs, A. (2019). Violence against Afghan women by husbands, mothers-in-law and siblings-in-law/siblings: Risk markers and health consequences in an analysis of the baseline of a randomised controlled trial. <i>PLoS ONE</i> , 14(2). | Risk factors for domestic violence among women.                   | Physical                        | Partner, family member           | Individual/relational     | Women n= 1,436  |
|                                                                                                  | Gibbs, A., Corboz, J., & Jewkes, R. (2018). Factors associated with recent intimate partner violence experience amongst currently married women in Afghanistan and health impacts of IPV: A cross sectional study. <i>BMC Public Health</i> , 18(1).               | Risk factors for IPV among married women.                         | Physical, psychological         | Partner                          | Individual/relational     |                 |
|                                                                                                  | Jewkes, R., Corboz, J., & Gibbs, A. (2018). Trauma exposure and IPV experienced by Afghan women: Analysis of the baseline of a randomised controlled trial. <i>PLoS ONE</i> , 13(10).                                                                              | Trauma exposure and IPV experience among women.                   | Physical                        | Partner, family member           | Individual/relational     |                 |
| Qualitative; in-depth interviews                                                                 | Mannell, J., Grewal, G., Ahmad, L., & Ahmad, A. (2020). A Qualitative Study of Women's Lived Experiences of Conflict and Domestic Violence in Afghanistan. <i>Violence Against Women</i> . Online.                                                                 | Women's lived experiences of conflict and domestic violence.      | Physical, psychological         | Partner                          |                           | Women n= 20     |
| Qualitative; in-depth interviews                                                                 | Ahmad, L., & Ancil Avoine, P. (2018). Misogyny in 'post-war' Afghanistan: the changing frames of sexual and gender-based violence. <i>Journal of Gender Studies</i> , 27(1), 86–101.                                                                               | Misogyny and gender-based violence in post-war Afghanistan.       | Physical, sexual, psychological | Partner, family member, stranger |                           | Women n= 40     |
| <b>Angola</b>                                                                                    |                                                                                                                                                                                                                                                                    |                                                                   |                                 |                                  |                           |                 |
| <b>Cooperation on Research and Development in Angola</b><br>Qualitative; focus group discussions | Strønen, I., Nangacovie, M., (2016). <i>Violence against women in the urban poverty of Angola</i> . Chr. Michelsen Institute. Brief volume 15, no. 16).                                                                                                            | Violence against women in the context of urban poverty in Angola. | Physical, sexual                | Partner                          |                           | Women n= 20     |
| <b>DHS 2016</b><br>Quantitative;<br>cross-sectional                                              | Yaya, S., Kunnuji, M., & Bishwajit, G. (2019). Intimate Partner Violence: A Potential Challenge for Women's Health in Angola. <i>Challenges</i> , 10(1), 21.                                                                                                       | Risk factors for IPV experience among women.                      | Physical, sexual, psychological | Partner                          | Individual/relational     | Women n= 7,699  |
|                                                                                                  | Yaya, S., & Ghose, B. (2019). Alcohol Drinking by Husbands/Partners Is Associated with Higher Intimate Partner                                                                                                                                                     | Partner's alcohol use and IPV among                               | Physical, sexual,               | Partner                          | Individual/relational     |                 |

**Supplementary material:****Risk factors for violence against women in high-prevalence settings: A mixed methods systematic review and meta-synthesis**

| Study name/design                         | Reference                                                                                                                                                                                                                                               | Focus                                                                               | VAW type(s)             | Perpetrator(s)         | Highest level of analysis | Sample                         |
|-------------------------------------------|---------------------------------------------------------------------------------------------------------------------------------------------------------------------------------------------------------------------------------------------------------|-------------------------------------------------------------------------------------|-------------------------|------------------------|---------------------------|--------------------------------|
|                                           | Violence against Women in Angola. <i>Safety</i> , 5(5).                                                                                                                                                                                                 | women.                                                                              | psychological           |                        |                           |                                |
| Quantitative; cross-sectional             | Nimi, T., Fraga, S., Costa, D., et al. (2019). Prevalence, determinants, and effects of violence during pregnancy: A maternity-based cross-sectional study in Luanda, Angola. <i>Journal of Public Health in Africa</i> , 10(2), 116–122.               | Prevalence and risk factors for violence among pregnant women.                      | Physical, psychological | Partner, family member | Individual/relational     | Women n= 995                   |
| <b>Bangladesh</b>                         |                                                                                                                                                                                                                                                         |                                                                                     |                         |                        |                           |                                |
| DHS 2003<br>Quantitative; cross-sectional | Johnson, K. B., & Das, M. B. (2009). Spousal violence in Bangladesh as reported by men: Prevalence and risk factors. <i>Journal of Interpersonal Violence</i> , 24(6), 977–995.                                                                         | Prevalence and risk factors for IPV perpetration among men.                         | Physical                | Partner                | Individual/relational     | Men n= 4,297                   |
|                                           | Aklimunnessa, K., Khan, M. M. H., Kabir, M., & Mori, M. (2007). Prevalence and correlates of domestic violence by husbands against wives in Bangladesh: evidence from a national survey. <i>The Journal of Men's Health &amp; Gender</i> , 4(1), 52–63. | Prevalence and risk factors for IPV perpetration among men.                         | Physical, sexual        | Partner                | Individual/relational     |                                |
|                                           | Silverman, J. G., Decker, M. R., Kapur, N. A., et al. (2006). Violence against wives, sexual risk and sexually transmitted infection among Bangladeshi men. <i>Sexually Transmitted Infections</i> , 83(3), 211–215.                                    | Men's sexual behaviours and IPV perpetration.                                       | Physical, sexual        | Partner                | Individual/relational     |                                |
| DHS 2007<br>Quantitative; cross-sectional | Afiaz, A., Biswas, R. K., Shamma, R., & Ananna, N. (2020). Intimate partner violence (IPV) with miscarriages, stillbirths and abortions: Identifying vulnerable households for women in Bangladesh. <i>PLoS ONE</i> , 15(7).                            | Risk factors for IPV among women and association with reproductive health outcomes. | Physical                | Partner                | Individual/relational     | Women n= 4,489<br>Men n= 3,339 |
|                                           | Sanawar, S. B., Islam, M. A., Majumder, S., & Misu, F. (2019). Women's empowerment and intimate partner violence in Bangladesh: investigating the complex relationship. <i>Journal of Biosocial Science</i> , 51(2), 188–202.                           | Relationship between women's empowerment and IPV.                                   | Physical, sexual        | Partner                | Individual/relational     |                                |
|                                           | Murshid, N. S., & Murshid, N. (2018). Intergenerational Transmission of Marital Violence: Results From a Nationally Representative Sample of Men. <i>Journal of Interpersonal Violence</i> , 33(2), 211–227.                                            | Intergenerational transmission of IPV among men.                                    | Partner                 | Partner                | Individual/relational     |                                |
|                                           | Yount, K. M., Roof, K. A., & Naved, R. T. (2018). Multilevel influences on men's partner violence justification, control over family decisions, and partner violence perpetration in Bangladesh. <i>Psychology of Violence</i> , 8(3), 367–378.         | Influences on men's IPV perpetration.                                               | Physical                | Partner                | Community                 |                                |
|                                           | Islam, M. J., Rahman, M., Broidy, L., Haque, et al. (2017). Assessing the link between witnessing inter-parental violence and the perpetration of intimate partner violence in                                                                          | Intergenerational transmission of IPV among men.                                    | Physical, sexual        | Partner                | Individual/relational     |                                |

**Supplementary material:****Risk factors for violence against women in high-prevalence settings: A mixed methods systematic review and meta-synthesis**

| Study name/design | Reference                                                                                                                                                                                                                                          | Focus                                                           | VAW type(s)      | Perpetrator(s) | Highest level of analysis | Sample |
|-------------------|----------------------------------------------------------------------------------------------------------------------------------------------------------------------------------------------------------------------------------------------------|-----------------------------------------------------------------|------------------|----------------|---------------------------|--------|
|                   | Bangladesh. <i>BMC Public Health</i> , 17(1).                                                                                                                                                                                                      |                                                                 |                  |                |                           |        |
|                   | Murshid, N. S. (2017). Men's Report of Domestic Violence Perpetration in Bangladesh: Correlates From a Nationally Representative Survey. <i>Journal of Interpersonal Violence</i> , 32(2), 290–307.                                                | Risk factors for men's IPV perpetration.                        | Physical, sexual | Partner        | Individual/relational     |        |
|                   | Akhter, R., & Wilson, J. K. (2016). Using an Ecological Framework to Understand Men's Reasons for Spousal Abuse: An Investigation of the Bangladesh Demographic and Health Survey 2007. <i>Journal of Family Violence</i> , 31(1), 27–38.          | Risk factors for IPV perpetration among men.                    | Physical         | Partner        | Individual/relational     |        |
|                   | Murshid, N. S. (2016). Men's response to their wives' participation in microfinance: perpetration and justification of intimate partner violence in Bangladesh. <i>Public Health</i> , 141, 146–152.                                               | Wife's microfinance participation and male perpetration of IPV. | Physical, sexual | Partner        | Individual/relational     |        |
|                   | Murshid, N. S., Akincigil, A., & Zippay, A. (2015). Microfinance Participation and Domestic Violence in Bangladesh: Results From a Nationally Representative Survey. <i>Journal of Interpersonal Violence</i> , 31(9), 1579–1596.                  | Wife's microfinance participant and female experience of IPV.   | Physical, sexual | Partner        | Individual/relational     |        |
|                   | Islam, T. M., Tareque, M. I., Sugawa, M., & Kawahara, K. (2015). Correlates of Intimate Partner Violence Against Women in Bangladesh. <i>Journal of Family Violence</i> , 30(4), 433–444.                                                          | Risk factors for women's experience of IPV.                     | Physical, sexual | Partner        | Individual/relational     |        |
|                   | Islam, T. M., Tareque, I., Tiedt, A. D., & Hoque, N. (2014). The intergenerational transmission of intimate partner violence in Bangladesh. <i>Global Health Action</i> , 7(1).                                                                    | Intergenerational transmission of IPV among women.              | Physical, sexual | Partner        | Individual/relational     |        |
|                   | Rahman, M., Hoque, M. A., Mostofa, M. G., & Makinoda, S. (2014). Association between adolescent marriage and intimate partner violence: A study of young adult women in Bangladesh. <i>Asia-Pacific Journal of Public Health</i> , 26(2), 160–168. | Adolescent marriage and IPV among women.                        | Physical, sexual | Partner        | Individual/relational     |        |
|                   | Bajracharya, A., & Amin, S. (2013). Microcredit and Domestic Violence in Bangladesh: An Exploration of Selection Bias Influences. <i>Demography</i> , 50(5), 1819–1843.                                                                            | Microcredit participation and IPV.                              | Physical         | Partner        | Individual/relational     |        |
|                   | Dalal, K., Dahlström, Ö., & Timpka, T. (2013). Interactions between microfinance programmes and non-economic empowerment of women associated with intimate partner violence in Bangladesh: a cross-sectional study. <i>BMJ Open</i> , 3(12).       | Microfinance, non-economic empowerment and IPV among women.     | Physical, sexual | Partner        | Individual/relational     |        |
|                   | Department for International Development. (2013). From Evidence to Policy: Addressing Gender-Based Violence                                                                                                                                        | Risk factors for IPV.                                           | Physical, sexual | Partner        | Community                 |        |

**Supplementary material:****Risk factors for violence against women in high-prevalence settings: A mixed methods systematic review and meta-synthesis**

| Study name/design                                                                                                       | Reference                                                                                                                                                                                                                                                                                                                                                  | Focus                                                             | VAW type(s)                     | Perpetrator(s) | Highest level of analysis | Sample                                                           |
|-------------------------------------------------------------------------------------------------------------------------|------------------------------------------------------------------------------------------------------------------------------------------------------------------------------------------------------------------------------------------------------------------------------------------------------------------------------------------------------------|-------------------------------------------------------------------|---------------------------------|----------------|---------------------------|------------------------------------------------------------------|
|                                                                                                                         | against Women and Girls in Bangladesh. London, UK.                                                                                                                                                                                                                                                                                                         |                                                                   |                                 |                |                           |                                                                  |
|                                                                                                                         | Rahman, M., Nakamura, K., Seino, K., & Kizuki, M. (2013). Does gender inequity increase the risk of intimate partner violence among women? Evidence from a national Bangladeshi sample. <i>PLoS ONE</i> , 8(12).                                                                                                                                           | Gender inequity and IPV experience among women.                   | Physical, sexual                | Partner        | Individual/relational     |                                                                  |
|                                                                                                                         | Rapp, D., Zoch, B., Khan, M. M. H., Pollmann, T., & Krämer, A. (2012). Association between gap in spousal education and domestic violence in India and Bangladesh. <i>BMC Public Health</i> , 12(1).                                                                                                                                                       | Spousal education gap and IPV.                                    | Physical                        | Partner        | Individual/relational     |                                                                  |
|                                                                                                                         | Rahman, M., Hoque, M. A., & Makinoda, S. (2011). Intimate Partner Violence Against Women: Is Women Empowerment a Reducing Factor? A Study from a National Bangladeshi Sample. <i>Journal of Family Violence</i> , 26(5), 411–420.                                                                                                                          | Women's empowerment and IPV experience.                           | Physical, sexual                | Partner        | Individual/relational     |                                                                  |
|                                                                                                                         | De, P. K., & Christian, A. (2020). Microfinance participation and intimate partner violence among women in Bangladesh. <i>Oxford Economic Papers</i> , 72(2), 435–452.                                                                                                                                                                                     | Microfinance participation and IPV among women.                   | Physical                        | Partner        | Individual/relational     | Women n= 12,662<br>Men n= 9,847<br>(urban health survey dataset) |
|                                                                                                                         | Sambisa, W., Angeles, G., Lance, P. M., Naved, R. T., & Thornton, J. (2011). Prevalence and correlates of physical spousal violence against women in slum and nonslum areas of urban Bangladesh. <i>Journal of Interpersonal Violence</i> , 26(13), 2592–2618.                                                                                             | Prevalence and risk factors for IPV experience among urban women. | Physical                        | Partner        | Individual/relational     |                                                                  |
|                                                                                                                         | Sambisa, W., Angeles, G., Lance, P. M., Naved, R. T., & Curtis, S. L. (2010). Physical and Sexual Abuse of Wives in Urban Bangladesh: Husbands' Reports. <i>Studies in Family Planning</i> , 41(3), 165–178.                                                                                                                                               | Risk factors for IPV perpetration among men.                      | Physical, sexual                | Partner        | Individual/relational     |                                                                  |
| <b>BRISC trial 2020</b><br>Quantitative;<br>cross-sectional<br>and longitudinal                                         | Hamadani, J. D., Hasan, M. I., Baldi, A. J., et al. (2020). Immediate impact of stay-at-home orders to control COVID-19 transmission on socioeconomic conditions, food insecurity, mental health, and intimate partner violence in Bangladeshi women and their families: an interrupted time series. <i>The Lancet Global Health</i> , 8(11), e1380–e1389. | Impact of covid-19 lockdown orders on IPV (among other outcomes). | Physical, sexual, psychological | Partner        | Individual/relational     | Women n= 2,424                                                   |
| <b>Gender Ideology, Microcredit &amp; Marital Violence in Rural Bangladesh 2009</b><br>Quantitative;<br>cross-sectional | Karim, K. M. R., & Law, C. K. (2016). Microcredit and Marital Violence: Moderating Effects of Husbands' Gender Ideology. <i>Journal of Family Violence</i> , 31(2), 227–238.                                                                                                                                                                               | Microcredit, gender ideology and IPV perpetration among men.      | Physical, sexual, psychological | Partner        | Individual/relational     | Men n= 243                                                       |
| <b>HERrespect</b>                                                                                                       | Gibbs, A., Jewkes, R., Willan, S., et al. (2019). Workplace                                                                                                                                                                                                                                                                                                | Risk factors for                                                  | Physical,                       | Manager        | Individual/               | Women n=                                                         |



**Supplementary material:****Risk factors for violence against women in high-prevalence settings: A mixed methods systematic review and meta-synthesis**

| Study name/design                                                                          | Reference                                                                                                                                                                                                                                                       | Focus                                                                             | VAW type(s)                | Perpetrator(s)         | Highest level of analysis | Sample            |
|--------------------------------------------------------------------------------------------|-----------------------------------------------------------------------------------------------------------------------------------------------------------------------------------------------------------------------------------------------------------------|-----------------------------------------------------------------------------------|----------------------------|------------------------|---------------------------|-------------------|
| <b>Intervention 2016</b><br>Quantitative;<br>cross-sectional                               | violence in Bangladesh's garment industry. <i>Social Science and Medicine</i> , 235.                                                                                                                                                                            | workplace violence among female garment workers.                                  | psychological              |                        | relational                | 800<br>Men n= 395 |
|                                                                                            | Naved, R. T., al Mamun, M., Parvin, K., et al. (2018). Magnitude and correlates of intimate partner violence against female garment workers from selected factories in Bangladesh. <i>PLoS ONE</i> , 13(11).                                                    | Prevalence and risk factors for IPV experience among female garment workers.      | Physical, sexual, economic | Partner                | Individual/relational     |                   |
| <b>Healthy Fertility Study (HFS) 2007</b><br>Quantitative;<br>cross-sectional              | Stake, S., Ahmed, S., Tol, W., et al. (2020). Prevalence, associated factors, and disclosure of intimate partner violence among mothers in rural Bangladesh. <i>Journal of Health, Population and Nutrition</i> , 39(1).                                        | Prevalence and risk factors for IPV experience among mothers.                     | Physical, sexual           | Partner                | Individual/relational     | Women n= 3,966    |
| <b>Suchana 2016 – 2017</b><br>Quantitative;<br>cross-sectional                             | Haque, M. A., Choudhury, N., Ahmed, S. M. T et al. (2020). Factors Associated with Domestic Violence in Rural Bangladesh. <i>Journal of Interpersonal Violence</i> . Online.                                                                                    | Risk factors for domestic violence.                                               | Physical, psychological    | Partner, family member | Individual/relational     | Women n= 5,440    |
| <b>UN Multi-Country Study on Men and Violence 2011</b><br>Quantitative;<br>cross-sectional | Semenza, D. C., Roof, K. A., James-Hawkins, L., Cheong, Y. F., Naved, R. T., & Yount, K. M. (2019). Gender-Equitable Parental Decision Making and Intimate Partner Violence Perpetration in Bangladesh. <i>Journal of Marriage and Family</i> , 81(4), 920–935. | Gender-equitable parental decision-making and IPV perpetration among men.         | Physical                   | Partner                | Community                 | Men n= 2,400      |
|                                                                                            | James-Hawkins, L., Cheong, Y. F., Naved, R. T., & Yount, K. M. (2018). Gender norms, violence in childhood, and men's coercive control in marriage: A multilevel analysis of young men in Bangladesh. <i>Psychology of Violence</i> , 8(5), 580–595.            | Gender norms, childhood violence and controlling behaviour in marriage among men. | Controlling behaviour      | Partner                | Community                 |                   |
|                                                                                            | Yount, K. M., James-Hawkins, L., Cheong, Y. F., & Naved, R. T. (2018). Men's perpetration of partner violence in Bangladesh: Community gender norms and violence in childhood. <i>Psychology of Men and Masculinity</i> , 19(1), 117–130.                       | Community gender norms, childhood violence and IPV perpetration among men.        | Physical                   | Partner                | Community                 |                   |
| Quantitative;<br>cross-sectional                                                           | Aktaruzzaman, K., & Farooq, O. (2020). Microfinance and domestic violence. <i>Journal of Adult Protection</i> , 22(5).                                                                                                                                          | Microfinance and IPV experience among women.                                      | Physical, psychological    | Partner                | Individual/relational     | Women n= 1,037    |
|                                                                                            | Reiss, K., Andersen, K., Pearson, E., et al. (2019). Unintended consequences of mHealth interactive voice messages promoting contraceptive use after menstrual regulation in Bangladesh: Intimate partner violence results from a                               | mHealth intervention promoting contraceptive use and IPV.                         | Physical                   | Partner                | Individual/relational     | Women n= 772      |

**Supplementary material:****Risk factors for violence against women in high-prevalence settings: A mixed methods systematic review and meta-synthesis**

| Study name/design | Reference                                                                                                                                                                                                                                                                                               | Focus                                                                                  | VAW type(s)                                     | Perpetrator(s) | Highest level of analysis | Sample         |
|-------------------|---------------------------------------------------------------------------------------------------------------------------------------------------------------------------------------------------------------------------------------------------------------------------------------------------------|----------------------------------------------------------------------------------------|-------------------------------------------------|----------------|---------------------------|----------------|
|                   | randomized controlled trial. <i>Global Health Science and Practice</i> , 7(3), 386–403.                                                                                                                                                                                                                 |                                                                                        |                                                 |                |                           |                |
|                   | Chowdhury, M. A. K., Rahman, A. E., Morium, S., et al. (2018). Domestic Violence Against Women in Urban Slums of Bangladesh: A Cross-Sectional Survey. <i>Journal of Interpersonal Violence</i> , online.                                                                                               | Risk factors for IPV experience among women.                                           | Physical                                        | Partner        | Individual/relational     | Women n= 87    |
|                   | Karim, R., & Swahnberg, K. (2018). Does Female Authority Prevent Male Marital Violence? Evidence From Rural Bangladesh. <i>Journal of Interpersonal Violence</i> . Online.                                                                                                                              | Female authority and IPV perpetration among men.                                       | Physical, sexual, psychological                 | Partner        | Individual/relational     | Men n= 342     |
|                   | Schuler, S. R., & Nazneen, S. (2018). Does Intimate Partner Violence Decline as Women's Empowerment becomes Normative? Perspectives of Bangladeshi Women. <i>World Development</i> , 101, 284–292.                                                                                                      | Women's empowerment and IPV experience.                                                | Physical                                        | Partner        | Individual/relational     | Women n= 74    |
|                   | Islam, M. J., Mazerolle, P., Broidy, L., & Baird, K. (2017). Exploring the Prevalence and Correlates Associated With Intimate Partner Violence During Pregnancy in Bangladesh. <i>Journal of Interpersonal Violence</i> , online.                                                                       | Prevalence and risk factors for IPV among pregnant women.                              | Physical, sexual, psychological                 | Partner        | Individual/relational     | Women n= 426   |
|                   | Yount, K. M., Crandall, A. A., Cheong, Y. F., et al. (2016). Child Marriage and Intimate Partner Violence in Rural Bangladesh: A Longitudinal Multilevel Analysis. <i>Demography</i> , 53(6), 1821–1852.                                                                                                | Child marriage and IPV experience among women.                                         | Physical                                        | Partner        | Community                 | Women n= 3,355 |
|                   | Hasan, T., Muhaddes, T., Camellia, S., Selim, N., & Rashid, S. F. (2014). Prevalence and Experiences of Intimate Partner Violence Against Women With Disabilities in Bangladesh: Results of an Explanatory Sequential Mixed-Method Study. <i>Journal of Interpersonal Violence</i> , 29(17), 3105–3126. | IPV among women with disabilities.                                                     | Physical, sexual, psychological                 | Partner        | Individual/relational     | Women n= 226   |
|                   | Heath, R. (2014). Women's Access to Labor Market Opportunities, Control of Household Resources, and Domestic Violence: Evidence from Bangladesh. <i>World Development</i> , 57, 32–46.                                                                                                                  | Women's access to labour market opportunities, control of household resources and IPV. | Physical                                        | Partner        | Individual/relational     | Women n= 1,395 |
|                   | Dalal, K., Rahman, F., & Jansson, B. (2009). Wife abuse in rural Bangladesh. <i>Journal of Biosocial Science</i> , 41(5), 561–573.                                                                                                                                                                      | Risk factors for IPV among women in Bangladesh.                                        | Physical, psychological, controlling behaviours | Partner        | Individual/relational     | Women n= 4,411 |
|                   | Bhuiya, A., Sharmin, T., & Hanifi, M. A. (2003). Nature of domestic violence against women in a rural area of Bangladesh: Implication for preventive Interventions. <i>Journal of Health Population and Nutrition</i> , 21(1), 48–54.                                                                   | Risk factors for VAW among couples.                                                    | Physical, psychological                         | Partner        | Individual/relational     | Women n= 19    |

**Supplementary material:****Risk factors for violence against women in high-prevalence settings: A mixed methods systematic review and meta-synthesis**

| Study name/design                   | Reference                                                                                                                                                                                                                                                                                | Focus                                                                    | VAW type(s)                                                       | Perpetrator(s)         | Highest level of analysis | Sample                                          |
|-------------------------------------|------------------------------------------------------------------------------------------------------------------------------------------------------------------------------------------------------------------------------------------------------------------------------------------|--------------------------------------------------------------------------|-------------------------------------------------------------------|------------------------|---------------------------|-------------------------------------------------|
| Qualitative; in-depth interviews    | Schuler, S. R., Lenzi, R., Badal, S. H., & Bates, L. M. (2017). Women's Empowerment as a Protective Factor Against Intimate Partner Violence in Bangladesh: A Qualitative Exploration of the Process and Limitations of Its Influence. <i>Violence Against Women</i> , 23(9), 1100–1121. | Women's perspectives on IPV and empowerment.                             | Physical                                                          | Partner                |                           | Women n= 74                                     |
|                                     | Murshid, N. S., & Zippay, A. (2017). Microfinance Participation and Marital Violence in Bangladesh: A Qualitative Inquiry. <i>Violence Against Women</i> , 23(14), 1752–1770.                                                                                                            | Microfinance and IPV in marriage.                                        | Physical, psychological                                           | Partner                |                           | Women n= 30                                     |
|                                     | Das, T. K., Alam, Md. F., Bhattacharyya, R., & Pervin, A. (2015). Causes and Contexts of Domestic Violence: Tales of Help-Seeking Married Women in Sylhet, Bangladesh. <i>Asian Social Work and Policy Review</i> , 9(2), 163–176.                                                       | Stories of help-seeking among married women experiencing IPV.            | Physical, psychological, controlling behaviours, economic         | Partner                |                           | Women n= 42                                     |
|                                     | Islam, Md. M., & Karim, K. M. R. (2012). Men's Views on Gender and Sexuality in a Bangladesh Village. <i>International Quarterly of Community Health Education</i> , 32(4), 339–354.                                                                                                     | Men's views on gender and sexuality.                                     | Physical, sexual                                                  | Partner                |                           | Men n= 10                                       |
|                                     | Naved, R. T., Blum, L. S., Chowdhury, et al. (2012). Violence against women with chronic maternal disabilities in rural Bangladesh. <i>Journal of Health, Population and Nutrition</i> , 30(2), 181–192.                                                                                 | Violence against women with chronic maternal disabilities.               | Physical, sexual, psychological                                   | Partner, family member |                           | Women n= 17                                     |
|                                     | Karim, K. M. R. (2006). Men's Arrack Drinking and Domestic Violence against Women in a Bangladeshi Village. <i>International Quarterly of Community Health Education</i> , 25(4), 367–380.                                                                                               | Men's arrack drinking and domestic violence.                             | Physical, sexual, psychological                                   | Partner                |                           | Women n= 50<br>Men n= 50                        |
|                                     | Khan, M. E., Townsend, J. W., & D'Costa, S. (2002). Behind closed doors: A qualitative study of sexual behaviour of married women in Bangladesh. <i>Culture, Health &amp; Sexuality</i> , 4(2), 237–256.                                                                                 | Qualitative study of sexual behaviour of married women.                  | Physical, sexual                                                  | Partner                |                           | Women n= 54                                     |
| Qualitative; combination of methods | Akhter, R., Wilson, J. K., Haque, S. E., & Ahamed, N. (2020). Like a Caged Bird: The Coping Strategies of Economically Empowered Women Who Are Victims of Intimate Partner Violence in Bangladesh. <i>Journal of Interpersonal Violence</i> . Online.                                    | Coping strategies among economically empowered women who experience IPV. | Physical                                                          | Partner                |                           | Women n= 19<br>Key informants n= 8              |
|                                     | Samuels, F., le Masson, V., & Gupta, T. (2019). One Step Forwards half a Step Backwards: Changing Patterns of Intimate Partner Violence in Bangladesh. <i>Journal of Family Violence</i> , 34(2), 107–118.                                                                               | Changing patterns of intimate partner violence in Bangladesh.            | Physical, psychological, sexual, controlling behaviours, economic | Partner                |                           | Women n= 6<br>Men n= 17<br>Key informants n= 40 |

**Supplementary material:****Risk factors for violence against women in high-prevalence settings: A mixed methods systematic review and meta-synthesis**

| Study name/<br>design   | Reference                                                                                                                                                                                                                                                                                | Focus                                                              | VAW type(s)                                                       | Perpetrator(s)                   | Highest level of analysis | Sample                                                              |
|-------------------------|------------------------------------------------------------------------------------------------------------------------------------------------------------------------------------------------------------------------------------------------------------------------------------------|--------------------------------------------------------------------|-------------------------------------------------------------------|----------------------------------|---------------------------|---------------------------------------------------------------------|
|                         | Islam, M. M., Jahan, N., & Hossain, M. D. (2018). Violence against women and mental disorder: a qualitative study in Bangladesh. <i>Tropical Medicine and Health</i> , 46(1), 5.                                                                                                         | Violence against women and mental disorder.                        | Physical, sexual, psychological, controlling behaviours, economic | Partner, family members          |                           | Women n= 19<br>Key informants n= 7                                  |
|                         | Naved, R., Rahman, T., Willan, S., et al. (2018). Female garment workers' experiences of violence in their homes and workplaces in Bangladesh: A qualitative study. <i>Social Science &amp; Medicine</i> , 196, 150–157.                                                                 | Female garment workers' experiences of IPV and workplace violence. | Physical, sexual, psychological, economic                         | Partner, manager                 |                           | Women n= 41                                                         |
|                         | Schuler, S. R., Lenzi, R., Huda Badal, S., & Nazneen, S. (2017). Men's perspectives on women's empowerment and intimate partner violence in rural Bangladesh. <i>Culture, Health &amp; Sexuality</i> , 20(1), 113–127.                                                                   | Men's perspectives on women's empowerment and IPV.                 | Physical                                                          | Partner                          |                           | Women n= 74                                                         |
|                         | Schuler, S. R., Lenzi, R., Badal, S. H., & Bates, L. M. (2017). Women's Empowerment as a Protective Factor Against Intimate Partner Violence in Bangladesh: A Qualitative Exploration of the Process and Limitations of Its Influence. <i>Violence Against Women</i> , 23(9), 1100–1121. | Women's empowerment as protection against IPV.                     | Physical                                                          | Partner                          |                           | Women n= 61<br>Men n= 46                                            |
|                         | Anwary, A. (2015). Construction of hegemonic masculinity: Violence against wives in Bangladesh. <i>Women's Studies International Forum</i> , 50, 37–46.                                                                                                                                  | Hegemonic masculinity and IPV.                                     | Physical                                                          | Partner                          |                           | Not specified                                                       |
|                         | Schuler, S. R., Lenzi, R., Nazneen, S., & Bates, L. M. (2013). Perceived Decline in Intimate Partner Violence Against Women in Bangladesh: Qualitative Evidence. <i>Studies in Family Planning</i> , 44(3), 243–257.                                                                     | Perceived decline in IPV against women in Bangladesh.              | Physical                                                          | Partner                          |                           | Women n= 62<br>Men n= 16<br>FGDs n= 11<br>(breakdown not available) |
| Qualitative; case study | Rezwana, N., & Pain, R. (2020). Gender- based violence before, during and after cyclones: slow violence and layered disasters. <i>Disasters</i> . 45, 741-761.                                                                                                                           | Gender-based violence before, during and after cyclones.           | Physical, sexual, psychological                                   | Partner, family member, stranger |                           | Women n= 29<br>Men n= 8<br>Key informants n=8                       |
| Mixed methods           | Karim, K. M. R., Emmelin, M., Resurreccion, B. P., & Wamala, S. (2012). <i>International Water Development Projects and Marital Violence: Experiences From Rural Bangladesh</i> .                                                                                                        | Water development projects and IPV.                                | Physical                                                          | Partner                          |                           | Women n= 16<br>Key informants n=5                                   |
|                         | Schuler, S. R., & Islam, F. (2008). Women's Acceptance of Intimate Partner Violence within Marriage in Rural Bangladesh. <i>Studies in Family Planning</i> , 39(1), 49–58.                                                                                                               | Women's acceptance of IPV in marriage.                             | Physical                                                          | Partner                          |                           | Women n= 606                                                        |
|                         | Naved, R. T., & Persson, L. Å. (2005). Factors Associated with Spousal Physical Violence against Women in Bangladesh.                                                                                                                                                                    | Risk factors for IPV among women.                                  | Physical                                                          | Partner                          |                           | Women n= 2,730                                                      |

**Supplementary material:****Risk factors for violence against women in high-prevalence settings: A mixed methods systematic review and meta-synthesis**

| Study name/design                                                                                                                 | Reference                                                                                                                                                                                                                                                          | Focus                                                                             | VAW type(s)                     | Perpetrator(s) | Highest level of analysis | Sample                          |
|-----------------------------------------------------------------------------------------------------------------------------------|--------------------------------------------------------------------------------------------------------------------------------------------------------------------------------------------------------------------------------------------------------------------|-----------------------------------------------------------------------------------|---------------------------------|----------------|---------------------------|---------------------------------|
|                                                                                                                                   | <i>Family Planning</i> , 36(4).<br>Bates, L. M., Schuler, S. R., Islam, F., & Islam, M. K. (2004). Socioeconomic Factors and Processes Associated With Domestic Violence in Rural Bangladesh. <i>International Family Planning Perspectives</i> , 30(04), 190–199. | Socioeconomic factors associated with IPV.                                        | Physical                        | Partner        |                           | Women n= 1,276                  |
| <b>WHO Multi-Country Study on Women's Health and Domestic Violence against Women 2000 – 2004</b><br>Quantitative; cross-sectional | VanderEnde, K. E., Sibley, L. M., Cheong, Y. F., et al. (2015). Community Economic Status and Intimate Partner Violence Against Women in Bangladesh: Compositional or Contextual Effects? <i>Violence Against Women</i> , 21(6), 679–699.                          | Community economic status and IPV among women.                                    | Physical, sexual                | Partner        | Individual/relational     | Women n= 3,130                  |
|                                                                                                                                   | Naved, R. T. (2013). Sexual violence towards married women in Bangladesh. <i>Archives of Sexual Behavior</i> , 42(4), 595–602.                                                                                                                                     | Risk factors for sexual IPV experience among women.                               | Sexual                          | Partner        | Individual/relational     |                                 |
|                                                                                                                                   | Naved, R. T., & Persson, L. A. (2008). Factors associated with physical spousal abuse of women during pregnancy in Bangladesh. <i>International Family Planning Perspectives</i> , 34(2), 71–78.                                                                   | Risk factors for physical IPV during pregnancy.                                   | Physical                        | Partner        | Individual/relational     |                                 |
| <b>Bolivia</b>                                                                                                                    |                                                                                                                                                                                                                                                                    |                                                                                   |                                 |                |                           |                                 |
| <b>Bolivia DHS 2008</b><br>Quantitative; cross-sectional                                                                          | Camargo, E. (2019). Gender inequality and intimate partner violence in Bolivia. <i>Revista Colombiana de Sociologia</i> , 42(2), 257–277.                                                                                                                          | Gender inequality and women's experience of IPV.                                  | Physical, psychological         | Partner        | Individual/relational     | Women n= 10,188<br>Men n= 2,795 |
|                                                                                                                                   | Meekers, D., Pallin, S. C., & Hutchinson, P. (2013). Prevalence and correlates of physical, psychological, and sexual intimate partner violence in Bolivia. <i>Global Public Health</i> , 8(5), 588–606.                                                           | Prevalence and risk factors for IPV among women.                                  | Physical, sexual, psychological | Partner        | Individual/relational     |                                 |
| Quantitative; cross-sectional                                                                                                     | Stieglitz, J., Trumble, B. C., Kaplan, H., & Gurven, M. (2018). Marital violence and fertility in a relatively egalitarian high-fertility population. <i>Nature Human Behaviour</i> , 2(8), 565–572.                                                               | Exploring marital violence and fertility among Tsimané forager-horticulturalists. | Physical                        | Partner        | Individual/relational     | Women n= 105                    |
|                                                                                                                                   | Stieglitz, J., Gurven, M., Kaplan, H., & Winking, J. (2012). Infidelity, jealousy, and wife abuse among Tsimané forager-farmers: testing evolutionary hypotheses of marital conflict. <i>Evolution and Human Behavior</i> , 33(5), 438–448.                        | Infidelity, jealous and IPV among Tsimané forager horticulturalists.              | Not specified                   | Partner        | Individual/relational     | Women n= 25<br>Men n= 21        |
|                                                                                                                                   | Stieglitz, J., Kaplan, H., Gurven, M., et al. (2011). Spousal violence and paternal disinvestment among Tsimané forager-horticulturalists. <i>American Journal of Human Biology</i> , 23(4), 445–457.                                                              | IPV and paternal disinvestment among Tsimané forager horticulturalists.           | Physical                        | Partner        | Individual/relational     | Women n= 49                     |
| <b>Burundi</b>                                                                                                                    |                                                                                                                                                                                                                                                                    |                                                                                   |                                 |                |                           |                                 |
| Quantitative;                                                                                                                     | Nandi, C., Elbert, T., Bambonye, M., Weierstall, R., Reichert,                                                                                                                                                                                                     | IPV perpetration                                                                  | Physical,                       | Partner        | Individual/               | Men n= 381                      |

**Supplementary material:****Risk factors for violence against women in high-prevalence settings: A mixed methods systematic review and meta-synthesis**

| Study name/design                             | Reference                                                                                                                                                                                                                                                                              | Focus                                                      | VAW type(s)                              | Perpetrator(s)                   | Highest level of analysis | Sample                     |
|-----------------------------------------------|----------------------------------------------------------------------------------------------------------------------------------------------------------------------------------------------------------------------------------------------------------------------------------------|------------------------------------------------------------|------------------------------------------|----------------------------------|---------------------------|----------------------------|
| cross-sectional                               | M., Zeller, A., & Crombach, A. (2017). Predicting domestic and community violence by soldiers living in a conflict region. <i>Psychological Trauma: Theory, Research, Practice, and Policy</i> , 9(6), 663–671.                                                                        | among soldiers in a conflict region.                       | sexual, psychological                    |                                  | relational                |                            |
|                                               | Crombach, A., & Bambonyé, M. (2015). Intergenerational violence in Burundi: Experienced childhood maltreatment increases the risk of abusive child rearing and intimate partner violence. <i>European Journal of Psychotraumatology</i> , 6, 26995.                                    | Intergenerational transmission of VAW among men and women. | Physical, sexual, controlling behaviours | Partner                          | Individual/relational     | Women n= 141<br>Men n= 141 |
| <b>Cameroon</b>                               |                                                                                                                                                                                                                                                                                        |                                                            |                                          |                                  |                           |                            |
| Quantitative; cross-sectional                 | Wadji, D. L., Ketcha Wanda, G. J. M., Wicky, C., et al. (2020). From the Mother to the Child: The Intergenerational Transmission of Experiences of Violence in Mother–Child Dyads Exposed to Intimate Partner Violence in Cameroon. <i>Journal of Interpersonal Violence</i> , online. | Intergenerational transmission of violence among women.    | Physical, sexual                         | Partner                          | Individual/relational     | Women n=74                 |
|                                               | Eze Eze, D. (2019). Microfinance programs and domestic violence in northern Cameroon; the case of the Familial Rural Income Improvement Program. <i>Review of Economics of the Household</i> , 17(3), 947–967.                                                                         | Microfinance programmes and IPV among women.               | Physical, psychological                  | Partner                          | Individual/relational     | Women n= 320               |
|                                               | Parmar, P., Agrawal, P., Greenough, P. G., Goyal, R., & Kayden, S. (2012). Sexual violence among host and refugee population in Djohong District, Eastern Cameroon. <i>Global Public Health</i> , 7(9), 974–994.                                                                       | Risk factors for IPV among host and refugee populations.   | Sexual                                   | Partner, family member, stranger | Individual/relational     | Women n= 600               |
| Qualitative; combination of methods           | Lim, S., Peitzmeier, S., Cange, C., et al. (2015). Violence against female sex workers in Cameroon: Accounts of violence, harm reduction, and potential solutions. <i>Journal of Acquired Immune Deficiency Syndromes</i> , 68, S241–S247.                                             | Violence against female sex workers in Cameroon.           | Physical, sexual                         | Client                           |                           | Women n= 101               |
| <b>Central African Republic</b>               |                                                                                                                                                                                                                                                                                        |                                                            |                                          |                                  |                           |                            |
| Qualitative; in-depth interviews              | Human Rights Watch. (2017). “They Said We Are Their Slaves.” <i>Sexual Violence by Armed Groups in the Central African Republic</i> . United States.                                                                                                                                   | Sexual violence by armed groups.                           | Sexual                                   | Combatants                       |                           | Women n= 296               |
| <b>Democratic Republic of the Congo</b>       |                                                                                                                                                                                                                                                                                        |                                                            |                                          |                                  |                           |                            |
| DRC DHS 2007<br>Quantitative; cross-sectional | Tlapek, S. M. (2015). Women’s Status and Intimate Partner Violence in the Democratic Republic of Congo. <i>Journal of Interpersonal Violence</i> , 30(14), 2526–2540.                                                                                                                  | Women’s status and experience of IPV.                      | Physical, sexual, psychological          | Partner                          | Individual/relational     | Women n= 3,436             |
|                                               | Peterman, A., Palermo, T., & Bredenkamp, C. (2011). Estimates and determinants of sexual violence against women in the Democratic Republic of Congo. <i>American Journal of Public Health</i> , 101(6), 1060–1067.                                                                     | Risk factors for sexual violence among women.              | Sexual                                   | Partner, stranger                | Individual/relational     |                            |



**Supplementary material:****Risk factors for violence against women in high-prevalence settings: A mixed methods systematic review and meta-synthesis**

| Study name/design                                                                                                                                              | Reference                                                                                                                                                                                                                                                                                  | Focus                                                                        | VAW type(s)                     | Perpetrator(s)    | Highest level of analysis | Sample                     |
|----------------------------------------------------------------------------------------------------------------------------------------------------------------|--------------------------------------------------------------------------------------------------------------------------------------------------------------------------------------------------------------------------------------------------------------------------------------------|------------------------------------------------------------------------------|---------------------------------|-------------------|---------------------------|----------------------------|
| <b>DRC DHS 2014</b><br>Quantitative;<br>cross-sectional                                                                                                        | Tiruneh, F. N., Chuang, K.-Y., Ntenda, P. A. M., & Chuang, Y.-C. (2018). Unwanted pregnancy, pregnancy loss, and other risk factors for intimate partner violence in the Democratic Republic of the Congo. <i>Women &amp; Health, 58</i> (9), 983–1000.                                    | Unwanted pregnancy, pregnancy loss and risk factors for IPV.                 | Physical, sexual, psychological | Partner           | Community                 | Women n= 5,120             |
|                                                                                                                                                                | Rustad, S. A., Østby, G., & Nordås, R. (2016). Artisanal mining, conflict, and sexual violence in Eastern DRC. <i>The Extractive Industries and Society, 3</i> , 475–484. <a href="https://doi.org/10.1016/j.exis.2016.01.010">https://doi.org/10.1016/j.exis.2016.01.010</a>              | Artisanal mining, conflict and sexual violence among women.                  | Sexual                          | Partner, stranger | Individual/relational     |                            |
| <b>Engaging with Faith Groups to Prevent Violence Against Women and Girls in Conflict-affected Communities 2015 – 2017</b><br>Quantitative;<br>cross-sectional | le Roux, E., Corboz, J., Scott, N., Sandilands, M., Lele, U. B., Bezzolato, E., & Jewkes, R. (2020). Engaging with faith groups to prevent VAWG in conflict-affected communities: Results from two community surveys in the DRC. <i>BMC International Health and Human Rights, 20</i> (1). | Engaging with faith groups to prevent VAWG in conflict-affected communities. | Physical, sexual, psychological | Partner           | Individual/relational     | Women n= 988<br>Men n= 961 |
| <b>Pigs for Peace (livestock microfinance intervention)</b><br>Qualitative; in-depth interviews                                                                | Kohli, A., Perrin, N., Mpanano, R. M., et al. (2015). Family and community driven response to intimate partner violence in post-conflict settings. <i>Social Science &amp; Medicine, 146</i> , 276–284.                                                                                    | Family and community responses to IPV in post-conflict settings.             | Physical, sexual                | Partner           |                           | Women n= 13<br>Men n= 5    |
| <b>Safe at Home 2018</b><br>Quantitative;<br>cross-sectional                                                                                                   | Scolese, A., Asghar, K., Pla Cordero, et al. (2020). Disability status and violence against women in the home in North Kivu, Democratic Republic of Congo. <i>Global Public Health, 15</i> (7), 985–998.                                                                                   | Disability status and IPV experience among women.                            | Physical, sexual                | Partner           | Individual/relational     | Women n= 98                |
| Quantitative;<br>retrospective cohort                                                                                                                          | Bartels, S. A., Scott, J. A., Mukwege, D., Lipton, R. I., et al. (2010). Patterns of sexual violence in Eastern Democratic Republic of Congo: reports from survivors presenting to Panzi Hospital in 2006. <i>Conflict and Health, 4</i> (1), 9.                                           | Prevalence of sexual violence.                                               | Sexual                          | Combatants        | Individual/relational     | Women n= 1,021             |
| Qualitative; in-depth interviews                                                                                                                               | Kiernan, B., Mishori, R., & Masoda, M. (2016). 'There is fear but there is no other work': a preliminary qualitative exploration of the experience of sex workers in eastern Democratic Republic of Congo. <i>Culture, Health &amp; Sexuality, 18</i> (3), 237–248.                        | Experiences of female sex-workers.                                           | Physical, sexual                | Clients           |                           | Women n= 8                 |
|                                                                                                                                                                | Elbert, T., Hinkel, H., Maedl, A., et al. (2013). <i>Sexual and Gender-Based Violence in the Kivu Provinces of the</i>                                                                                                                                                                     | Insights from combatants on VAW.                                             | Sexual                          | Stranger          |                           | Men n= 213                 |

**Supplementary material:****Risk factors for violence against women in high-prevalence settings: A mixed methods systematic review and meta-synthesis**

| Study name/design                                                                     | Reference                                                                                                                                                                                                                                                                    | Focus                                                                        | VAW type(s)                     | Perpetrator(s)    | Highest level of analysis | Sample                                                                          |
|---------------------------------------------------------------------------------------|------------------------------------------------------------------------------------------------------------------------------------------------------------------------------------------------------------------------------------------------------------------------------|------------------------------------------------------------------------------|---------------------------------|-------------------|---------------------------|---------------------------------------------------------------------------------|
|                                                                                       | <i>Democratic Republic of Congo: Insights from Former Combatants</i> . World Bank, Washington, DC.                                                                                                                                                                           |                                                                              |                                 |                   |                           |                                                                                 |
|                                                                                       | Human Rights Watch. (2009). <i>Soldiers who rape, commanders who condone: Sexual violence and military reform in the Democratic Republic of Congo</i> . New York, USA.                                                                                                       | Sexual violence and military reform in the Democratic Republic of Congo.     | Sexual                          | Partner, stranger |                           | Women n= 36                                                                     |
| Qualitative; focus group discussions                                                  | Kelly, J., Kabanga, J., Cragin, W., et al. (2012). 'If your husband doesn't humiliate you, other people won't': Gendered attitudes towards sexual violence in eastern Democratic Republic of Congo. <i>Global Public Health</i> , 7(3), 285–298.                             | Gendered attitudes towards sexual violence in eastern DRC.                   | Sexual                          | Stranger          |                           | Women n= 45<br>Men n= 41                                                        |
| Qualitative; combination of methods                                                   | International Rescue Committee. (2019). <i>"Everything on her shoulders" Rapid assessment on gender and violence against women and girls in the Ebola outbreak in Beni, DRC</i> . New York, USA.                                                                             | Gender and violence against women and girls in the Ebola outbreak            | Physical, sexual, psychological | Partner, stranger |                           | FGDs with men and women n= 34 (breakdown not available)<br>Key informants n= 24 |
| <b>Fiji</b>                                                                           |                                                                                                                                                                                                                                                                              |                                                                              |                                 |                   |                           |                                                                                 |
| Quantitative; cross-sectional                                                         | Fiji Women's Crisis Center. (2011). <i>Somebody's Life, Everybody's Business!</i> National Research on Women's Health and Life Experiences in Fiji (2010/2011): A survey exploring the prevalence, incidence and attitudes to intimate partner violence in Fiji. Suva, Fiji. | Risk factors for IPV experience among women.                                 | Physical, sexual                | Partner           | Individual/relational     | Women n= 2,872                                                                  |
| <b>Kiribati</b>                                                                       |                                                                                                                                                                                                                                                                              |                                                                              |                                 |                   |                           |                                                                                 |
| <b>Kiribati Family Health and Support Study 2010</b><br>Quantitative; cross-sectional | Secretariat of the Pacific Community. (2010). <i>Kiribati Family Health and Support Study: A study on violence against women and children</i> . Noumea, New Caledonia.                                                                                                       | Risk factors for IPV experience among women.                                 | Physical, sexual                | Partner           | Individual/relational     |                                                                                 |
| <b>Liberia</b>                                                                        |                                                                                                                                                                                                                                                                              |                                                                              |                                 |                   |                           |                                                                                 |
| <b>DHS 2007</b><br>Quantitative; cross-sectional                                      | Kelly, J., Colantuoni, E., Robinson, C., & Decker, M. R. (2019). From political to personal violence: Links between conflict and non-partner physical violence in post-conflict Liberia. <i>Global Public Health</i> , 14(12), 1639–1652.                                    | Political conflict and non-partner physical violence experience among women. | Physical                        | Non-partner       | Individual/relational     | Women n= 4,502                                                                  |
|                                                                                       | Kelly, J. T. D., Colantuoni, E., Robinson, C., & Decker, M. R. (2018). From the battlefield to the bedroom: a multilevel analysis of the links between political conflict and intimate partner violence in Liberia. <i>BMJ Global Health</i> , 3(2).                         | Political conflict and IPV experience among women.                           | Physical, sexual                | Partner           | Individual/relational     |                                                                                 |



**Supplementary material:****Risk factors for violence against women in high-prevalence settings: A mixed methods systematic review and meta-synthesis**

| Study name/design                                                                                             | Reference                                                                                                                                                                                                                                                              | Focus                                                                                   | VAW type(s)                               | Perpetrator(s) | Highest level of analysis | Sample                   |
|---------------------------------------------------------------------------------------------------------------|------------------------------------------------------------------------------------------------------------------------------------------------------------------------------------------------------------------------------------------------------------------------|-----------------------------------------------------------------------------------------|-------------------------------------------|----------------|---------------------------|--------------------------|
| Quantitative; cross-sectional                                                                                 | Sileo, K. M., Kershaw, T. S., Gilliam, et al (2019). Trauma Exposure and Intimate Partner Violence Among Young Pregnant Women in Liberia. <i>Journal of Interpersonal Violence</i> , online.                                                                           | Trauma exposure and IPV experience among young pregnant women.                          | Physical, sexual, psychological           | Partner        | Individual/relational     | Women n= 183             |
|                                                                                                               | Allen, M., & Devitt, C. (2012). Intimate Partner Violence and Belief Systems in Liberia. <i>Journal of Interpersonal Violence</i> , 27(17), 3514–3531.                                                                                                                 | Belief systems and IPV.                                                                 | Physical, sexual, psychological, economic | Partner        | Individual/relational     | Women n= 229             |
| <b>Micronesia</b>                                                                                             |                                                                                                                                                                                                                                                                        |                                                                                         |                                           |                |                           |                          |
| <b>Family Health and Safety Study</b><br>Quantitative; cross-sectional)                                       | FSM Department of Health and Social Affairs. (2014). <i>Federated States of Micronesia Family Health and Safety Study</i> . Palikir, FSM.                                                                                                                              | Risk factors for IPV experience among women.                                            | Physical, sexual                          | Partner        | Individual/r relational   | Women n= 822             |
| Qualitative; ethnography                                                                                      | Smith, S. A. (2019). Gender, Relationships and Sexual Violence in the Lives of Women from Chuuk, Micronesia. <i>Journal of Aggression, Maltreatment and Trauma</i> , 28(2), 146–165.                                                                                   | Gender, relationships and sexual violence in the lives of women from Chuuk, Micronesia. | Sexual                                    | Partner        |                           | Women n= 15              |
| Mixed methods                                                                                                 | Dugwen, G. L., Hancock, W. T., Gilmar, J., et al. (2013). Domestic violence against women on Yap, Federated States of Micronesia. <i>Hawai'i Journal of Medicine &amp; Public Health</i> , 72(9), 318–322.                                                             | Prevalence and perceptions of IPV.                                                      | Physical, sexual                          | Partner        |                           | Women n= 8               |
| <b>Sierra Leone</b>                                                                                           |                                                                                                                                                                                                                                                                        |                                                                                         |                                           |                |                           |                          |
| <b>Longitudinal Study of War-Affected youth in Sierra Leone (LSWAY) 2008</b><br>Quantitative; cross-sectional | Alleyne-Green, B., Kulick, A., Matsuzaka, S., & Betancourt, T. S. (2019). War Violence Exposure, Reintegration Experiences and Intimate Partner Violence Among a Sample of War-Affected Females in Sierra Leone. <i>Global Social Welfare</i> , 6(2), 97–106.          | War violence exposure, reintegration experiences and IPV among war-affected females.    | Physical, sexual, psychological           | Partner        | Individual/relational     | Women n= 76<br>Men n= 92 |
|                                                                                                               | Alleyne-Green, B., Kulick, A., Grocher, K., & Betancourt, T. S. (2018). Physical and Sexual Violence Experienced by Male War-Affected Youth: Implications for Post-Conflict Functioning and Intimate Relationships. <i>Journal of Interpersonal Violence</i> . Online. | Experience of war-time violence and IPV among war-affected males.                       | Physical, sexual, psychological           | Partner        | Individual/relational     |                          |
| Quantitative; cross-sectional                                                                                 | Amowitz, L. L. (2002). Prevalence of War-Related Sexual Violence and Other Human Rights Abuses Among Internally Displaced Persons in Sierra Leone. <i>JAMA</i> , 287(4), 513.                                                                                          | Prevalence of sexual violence among internally displaced persons.                       | Physical, sexual                          | Combatants     | Individual/relational     | Women n= 994             |
| Qualitative; in-                                                                                              | Human Rights Watch. (2009). "We'll Kill You If You Cry"                                                                                                                                                                                                                | Sexual Violence in                                                                      | Sexual                                    | Partner,       |                           | Women n=                 |

**Supplementary material:****Risk factors for violence against women in high-prevalence settings: A mixed methods systematic review and meta-synthesis**

| Study name/design                                                                              | Reference                                                                                                                                                                                                                                                                          | Focus                                                                                 | VAW type(s)                      | Perpetrator(s) | Highest level of analysis | Sample                         |
|------------------------------------------------------------------------------------------------|------------------------------------------------------------------------------------------------------------------------------------------------------------------------------------------------------------------------------------------------------------------------------------|---------------------------------------------------------------------------------------|----------------------------------|----------------|---------------------------|--------------------------------|
| depth interviews                                                                               | Sexual Violence In The Sierra Leone Conflict. New York, USA.                                                                                                                                                                                                                       | the Sierra Leone Conflict.                                                            |                                  | stranger       |                           | 300                            |
| <b>Solomon Islands</b>                                                                         |                                                                                                                                                                                                                                                                                    |                                                                                       |                                  |                |                           |                                |
| <b>Solomon Islands Family Health and Safety Study 2009</b><br>Quantitative;<br>cross-sectional | Solomon Islands Ministry of Women Youth and Children's Affairs. (2009). <i>Solomon Islands Family Health and Safety Study: A study on violence against women and children.</i> Honiara, Solomon Islands.                                                                           | Risk factors for IPV experience among women.                                          | Physical, sexual                 | Partner        | Individual/relational     | Women n= 2,246                 |
| <b>Tanzania</b>                                                                                |                                                                                                                                                                                                                                                                                    |                                                                                       |                                  |                |                           |                                |
| <b>Tanzania DHS 2010</b><br>Quantitative;<br>cross-sectional                                   | Vyas, S., & Heise, L. (2014). Using Propensity Score Matching to Estimate an "Unbiased Effect-Size" Between Women's Employment and Partner Violence in Tanzania. <i>Journal of Interpersonal Violence, 29</i> (16), 2971–2990.                                                     | Propensity score matching to estimate effect-size between women's employment and IPV. | Physical, sexual, psychological  | Partner        | Individual/relational     | Women n= 5,688                 |
|                                                                                                | Vyas, S., & Heise, L. (2016). How do area-level socioeconomic status and gender norms affect partner violence against women? Evidence from Tanzania. <i>International Journal of Public Health, 61</i> (8), 971–980.                                                               | Impact of area-level socioeconomic status and gender norms on IPV among women.        | Physical, sexual                 | Partner        | Community                 |                                |
|                                                                                                | Reese, B. M., Chen, M. S., Nekkanti, M., & Mulawa, M. I. (2017). Prevalence and Risk Factors of Women's Past-Year Physical IPV Perpetration and Victimization in Tanzania. <i>Journal of Interpersonal Violence.</i> Online.                                                       | Prevalence and risk factors for IPV among women.                                      | Physical                         | Partner        | Individual/relational     |                                |
| <b>Tanzania DHS 2015</b><br>Quantitative;<br>cross-sectional                                   | Vyas, S., & Jansen, H. A. F. M. (2018). Unequal power relations and partner violence against women in Tanzania: a cross-sectional analysis. <i>BMC Women's Health, 18</i> (1), 185.                                                                                                | Unequal power relation and IPC among men and women.                                   | Physical, sexual                 | Partner        | Individual/relational     | Women n= 1,278<br>Men n= 1,278 |
| <b>MAISHA trial</b><br>Quantitative;<br>cross-sectional and longitudinal                       | Abramsky, T., Kapinga, I., Mshana, G., et al (2020). Couples data from north-western Tanzania: Insights from a survey of male partners of women enrolled in the MAISHA cluster randomized trial of an intimate partner violence prevention intervention. <i>PLoS ONE, 15</i> (10). | Risk factors for IPV using couples data.                                              | Physical, sexual                 | Partner        | Individual/relational     | Women n= 1,940<br>Men n= 452   |
|                                                                                                | Abramsky, T., Lees, S., Stöckl, H., et al. (2019). Women's income and risk of intimate partner violence: Secondary findings from the MAISHA cluster randomised trial in North-Western Tanzania. <i>BMC Public Health, 19</i> (1).                                                  | Women's income and IPV experience.                                                    | Physical, sexual, economic       | Partner        | Individual/relational     |                                |
|                                                                                                | Kapiga, S., Harvey, S., Muhammad, A. K., Stöckl, H., Mshana, G., Hashim, R., Hansen, C., Lees, S., & Watts, C. (2017). Prevalence of intimate partner violence and abuse and                                                                                                       | Prevalence and risk factors for IPV among women.                                      | Physical, sexual, psychological, | Partner        | Individual/relational     |                                |

**Supplementary material:****Risk factors for violence against women in high-prevalence settings: A mixed methods systematic review and meta-synthesis**

| Study name/<br>design                                                                                                             | Reference                                                                                                                                                                                                                                                            | Focus                                                                       | VAW type(s)                      | Perpetrator(s)       | Highest level of analysis | Sample         |
|-----------------------------------------------------------------------------------------------------------------------------------|----------------------------------------------------------------------------------------------------------------------------------------------------------------------------------------------------------------------------------------------------------------------|-----------------------------------------------------------------------------|----------------------------------|----------------------|---------------------------|----------------|
|                                                                                                                                   | associated factors among women enrolled into a cluster randomised trial in northwestern Tanzania. <i>BMC Public Health</i> , 17(1).                                                                                                                                  |                                                                             | economic, controlling behaviours |                      |                           |                |
| <b>MAP project (Men as Partners)</b><br>Quantitative; cross-sectional                                                             | Kazaura, M. R., Ezekiel, M. J., & Chitama, D. (2016). Magnitude and factors associated with intimate partner violence in mainland Tanzania. <i>BMC Public Health</i> , 16(1).                                                                                        | Risk factors for IPV experience among women.                                | Physical, sexual, psychological  | Partner              | Individual/relational     | Women n= 471   |
| <b>Sauti project 2015</b><br>Quantitative; cross-sectional                                                                        | Nyato, D., Materu, J., Kuringe, E., et al. (2019). Prevalence and correlates of partner violence among adolescent girls and young women: Evidence from baseline data of a cluster randomised trial in Tanzania. <i>PLoS ONE</i> , 14(10)                             | Prevalence and risk factors for IPV among adolescent girls and young women. | Physical, sexual, psychological  | Partner              | Individual/relational     | Women n= 2,276 |
| <b>Shikamana Project 2015 – 2016</b><br>Quantitative; cross-sectional                                                             | Hendrickson, Z. M., Leddy, A. M., Galai, N., et al. (2018). Work-related mobility and experiences of gender-based violence among female sex workers in Iringa, Tanzania: A cross-sectional analysis of baseline data from Project Shikamana. <i>BMJ Open</i> , 8(9). | Work-related mobility and violence among female sex-workers.                | Physical, sexual                 | Partner, non-partner | Individual/relational     | Women n= 496   |
| <b>Vijana Vijiweni II 2013 – 2014</b><br>Quantitative; cross-sectional                                                            | Mulawa, M. I., Reyes, H., Foshee, et al. (2018). Associations Between Peer Network Gender Norms and the Perpetration of Intimate Partner Violence Among Urban Tanzanian Men: a Multilevel Analysis. <i>Prevention Science</i> , 19(4), 427–436.                      | Peer network gender norms and IPV perpetration among urban men.             | Physical                         | Partner              | Individual/relational     | Men n= 1,113   |
|                                                                                                                                   | Mulawa, M., Kajula, L. J., Yamanis, T. et al. (2018). Perpetration and Victimization of Intimate Partner Violence Among Young Men and Women in Dar es Salaam, Tanzania. <i>Journal of Interpersonal Violence</i> , 33(16), 2486–2511.                                | Risk factors for IPV experience and perpetration among young men and women. | Physical, sexual, psychological  | Partner              | Community                 |                |
| <b>Vijana Vijiweni II 2013 – 2014</b><br>Qualitative; in-depth interviews                                                         | Mulawa, M. I., Kajula, L. J., & Maman, S. (2018). Peer network influence on intimate partner violence perpetration among urban Tanzanian men. <i>Culture, Health and Sexuality</i> , 20(4), 474–488.                                                                 | Peer network influence on IPV perpetration among urban men.                 | Physical                         | Partner              |                           | Men n= 40      |
| <b>WHO Multi-Country Study on Women's Health and Domestic Violence against Women 2000 – 2004</b><br>Quantitative; cross-sectional | Vyas, S., Jansen, H. A. F. M., Heise, L., & Mbwambo, J. (2015). Exploring the association between women's access to economic resources and intimate partner violence in Dar es Salaam and Mbeya, Tanzania. <i>Social Science and Medicine</i> , 146, 307–315.        | Women's access to economic resources and IPV experience.                    | Physical, sexual                 | Partner              | Community                 | Women n= 3,270 |
|                                                                                                                                   | Stöckl, H., Watts, C., & Kilonzo Mbwambo, J. K. (2010). Physical violence by a partner during pregnancy in Tanzania: Prevalence and risk factors. <i>Reproductive Health Matters</i> , 18(36), 171–180.                                                              | Prevalence and risk factors for physical IPV during pregnancy.              | Physical                         | Partner              | Individual/relational     |                |

**Supplementary material:****Risk factors for violence against women in high-prevalence settings: A mixed methods systematic review and meta-synthesis**

| Study name/design                                                                                                                                                                                                                                                    | Reference                                                                                                                                                                                                                                                                                                                         | Focus                                                                                                                                                         | VAW type(s)                                | Perpetrator(s)             | Highest level of analysis | Sample                     |
|----------------------------------------------------------------------------------------------------------------------------------------------------------------------------------------------------------------------------------------------------------------------|-----------------------------------------------------------------------------------------------------------------------------------------------------------------------------------------------------------------------------------------------------------------------------------------------------------------------------------|---------------------------------------------------------------------------------------------------------------------------------------------------------------|--------------------------------------------|----------------------------|---------------------------|----------------------------|
| Quantitative; cross-sectional                                                                                                                                                                                                                                        | Aloyce, Z., Larson, E., Komba, A., Mwimba, A., Kaale, A., Minja, A., Siril, H., Kamala, J., Somba, M., Ngakongwa, F., Kaaya, S., & Fawzi, M. C. S. (2020). Prevalence and factors associated with intimate partner violence after HIV status disclosure among pregnant women with depression in Tanzania. <i>AIDS Care</i> , 1–7. | Prevalence and risk factors for IPV after HIV disclosure among pregnant women.                                                                                | Physical, sexual, psychological            | Partner                    | Individual/relational     | Women n= 659               |
|                                                                                                                                                                                                                                                                      | Messersmith, L. J., Halim, N., Steven Mzilangwe, E., et al. (2017). Childhood Trauma, Gender Inequitable Attitudes, Alcohol Use and Multiple Sexual Partners: Correlates of Intimate Partner Violence in Northern Tanzania. <i>Journal of Interpersonal Violence</i> , online.                                                    | Childhood trauma, gender inequitable attitudes, alcohol use, multiple partners and IPV among women.                                                           | Physical, sexual, psychological, economic  | Partner                    | Individual/relational     | Women n= 450<br>Men n= 450 |
|                                                                                                                                                                                                                                                                      | Sigalla, G. N., Rasch, V., Gammeltoft, T., et al. (2017). Social support and intimate partner violence during pregnancy among women attending antenatal care in Moshi Municipality, Northern Tanzania. <i>BMC Public Health</i> , 17(1).                                                                                          | Social support and IPV during pregnancy among women attending antenatal care.                                                                                 | Physical, sexual, psychological            | Partner                    | Individual/relational     | Women n= 1,116             |
|                                                                                                                                                                                                                                                                      | Laisser, R., Nyström, L., & Emmelin, M. (2014). Health-care workers' attitudes and perceptions of intimate partner violence against women in Tanzania. <i>African Journal of Midwifery and Women's Health</i> , 8(1), 28–35.                                                                                                      | Healthcare workers' perceptions of IPV.                                                                                                                       | Physical, sexual, psychological            | Partner                    | Individual/relational     | Men n= 75                  |
|                                                                                                                                                                                                                                                                      | Prabhu, M., Mchome, B., Ostermann, J., et al. (2011). Prevalence and correlates of intimate partner violence among women attending HIV voluntary counseling and testing in northern Tanzania, 2005-2008. <i>International Journal of Gynecology &amp; Obstetrics</i> , 113(1), 63–67.                                             | Prevalence and risk factors for IPV among women attending HIV testing and counselling.                                                                        | Physical, sexual, psychological            | Partner                    | Individual/relational     | Women n= 2,436             |
|                                                                                                                                                                                                                                                                      | McCloskey, L. A., Williams, C., & Larsen, U. (2005). Gender inequality and intimate partner violence among women in Moshi, Tanzania. <i>International Family Planning Perspectives</i> , 31(3), 124–130.                                                                                                                          | Gender inequality and IPV experience among women.                                                                                                             | Physical, sexual                           | Partner                    | Individual/relational     | Women n= 1,444             |
|                                                                                                                                                                                                                                                                      | Qualitative; in-depth interviews                                                                                                                                                                                                                                                                                                  | Vyas, S., Mbwambo, J., & Heise, L. (2015). Women's Paid Work and Intimate Partner Violence: Insights from Tanzania. <i>Feminist Economics</i> , 21(1), 35–58. | Women's perspectives on paid work and IPV. | Physical, sexual, economic | Partner                   |                            |
| Lary, H., Maman, S., Katebalila, M., & Mbwambo, J. (2004). Exploring the Association between HIV and Violence: Young People's Experiences with Infidelity, Violence and Forced Sex in Dar es Salaam, Tanzania. <i>Family Planning Perspectives</i> , 30(4), 200–206. |                                                                                                                                                                                                                                                                                                                                   | Young people's experiences with infidelity, violence and forced sex.                                                                                          | Physical, sexual                           | Partner, family member     |                           | Women n= 20<br>Men n= 40   |
| Qualitative; focus group discussions                                                                                                                                                                                                                                 | Abeid, M., Muganyizi, P., Olsson, P., et al. (2014). Community perceptions of rape and child sexual abuse: a qualitative study                                                                                                                                                                                                    | Community perceptions of rape                                                                                                                                 | Sexual                                     | Partner, family member,    |                           | Community members n=       |

**Supplementary material:****Risk factors for violence against women in high-prevalence settings: A mixed methods systematic review and meta-synthesis**

| Study name/<br>design                                                               | Reference                                                                                                                                                                                                                                  | Focus                                                                      | VAW type(s)                     | Perpetrator(s) | Highest level of analysis | Sample                                           |
|-------------------------------------------------------------------------------------|--------------------------------------------------------------------------------------------------------------------------------------------------------------------------------------------------------------------------------------------|----------------------------------------------------------------------------|---------------------------------|----------------|---------------------------|--------------------------------------------------|
|                                                                                     | in rural Tanzania. <i>BMC International Health and Human Rights</i> , 14(1), 23.                                                                                                                                                           | and child sexual abuse.                                                    |                                 | stranger       |                           | 54                                               |
|                                                                                     | Laisser, R. M., Nyström, L., Lugina, H. I., & Emmelin, M. (2011). Community perceptions of intimate partner violence - a qualitative study from urban Tanzania. <i>BMC Women's Health</i> , 11(1), 13.                                     | Community perceptions of intimate partner violence.                        | Physical, sexual                | Partner        |                           | Key informants n = 75                            |
| Qualitative; combination of methods                                                 | Manji, K., Heise, L., & Cislighi, B. (2020). Couples' Economic Equilibrium, Gender Norms and Intimate Partner Violence in Kirumba, Tanzania. <i>Violence against Women</i> , 26(15–16), 2062–2082.                                         | Couples' economic equilibrium, gender norms and intimate partner violence. | Physical, economic              | Partner        |                           | Women n= 58<br>Men n= 58                         |
| Qualitative; ethnographic                                                           | Kenny, E. (2019). Narrating Rape: An Ethnographic Case-Study of Non-Consensual Sexual Debut in Tanzania. <i>Journal of Aggression, Maltreatment and Trauma</i> , 28(1), 106–125.                                                           | An ethnographic case-study of non-consensual sexual debut in Tanzania.     | Sexual                          | Stranger       |                           | Women n= 1                                       |
| Mixed methods                                                                       | Rehema, M., & Prisca, K. (2016). The Causes of Intimate Partner Violence in Babati District - University College London. <i>International Journal of Innovation and Applied Studies</i> , 17(4).                                           | Causes of IPV.                                                             | Physical, sexual, economic      | Partner        |                           | Women n= 50<br>Men n= 20<br>Key informants n= 24 |
|                                                                                     | Grabe, S., Grose, R. G., & Dutt, A. (2015). Women's Land Ownership and Relationship Power: A Mixed Methods Approach to Understanding Structural Inequities and Violence Against Women. <i>Psychology of Women Quarterly</i> , 39(1), 7–19. | Women's land ownership, relationship power and violence against women.     | Physical, psychological         | Partner        |                           | Women n= 225                                     |
| <b>Timor-Leste</b>                                                                  |                                                                                                                                                                                                                                            |                                                                            |                                 |                |                           |                                                  |
| <b>DHS 2016</b><br>Quantitative;<br>cross-sectional                                 | Pengpid, S. (2018). Intimate partner victimization and perpetration among female adolescents and adults in Timor-Leste. <i>Gender &amp; Behaviour</i> , 16(1), 11055–11064.                                                                | Risk factors for IPV among female adolescents and women.                   | Physical, sexual                | Partner        | Individual/<br>relational | Women n= 3,694                                   |
| <b>DILI birth cohort study data 2013 – 2015</b><br>Quantitative;<br>cross-sectional | Rees, S., Mohsin, M., Tay, et al. (2018). Risk of perpetrating intimate partner violence amongst men exposed to torture in conflict-affected Timor-Leste. <i>Global Mental Health</i> , 5, e23.                                            | Exposure to torture during conflict and IPV perpetration among men.        | Physical, sexual, psychological | Partner        | Individual/<br>relational | Women n= 1,672<br>Men n= 889                     |
|                                                                                     | Rees, S., Mohsin, M., Tay, A. K., et al. (2017). Associations between bride price stress and intimate partner violence amongst pregnant women in Timor-Leste. <i>Globalization and Health</i> , 13(1).                                     | Bride price stress and IPV among pregnant women.                           | Physical, psychological         | Partner        | Individual/<br>relational |                                                  |
| Qualitative; combination of methods                                                 | Rees, S., Thorpe, R., Tol, W., et al. (2015). Testing a cycle of family violence model in conflict-affected, low-income countries: A qualitative study from Timor-Leste. <i>Social Science</i>                                             | Intergenerational transmission of violence within                          | Physical                        | Partner        |                           | Women n= 77                                      |

**Supplementary material:****Risk factors for violence against women in high-prevalence settings: A mixed methods systematic review and meta-synthesis**

| Study name/design                                   | Reference                                                                                                                                                                                                                                                               | Focus                                                                 | VAW type(s)                     | Perpetrator(s) | Highest level of analysis | Sample          |
|-----------------------------------------------------|-------------------------------------------------------------------------------------------------------------------------------------------------------------------------------------------------------------------------------------------------------------------------|-----------------------------------------------------------------------|---------------------------------|----------------|---------------------------|-----------------|
|                                                     | <i>and Medicine</i> , 130, 284–291.                                                                                                                                                                                                                                     | families.                                                             |                                 |                |                           |                 |
| <b>Uganda</b>                                       |                                                                                                                                                                                                                                                                         |                                                                       |                                 |                |                           |                 |
| <b>DHS 2006</b><br>Quantitative;<br>cross-sectional | Ogland, E. G., Xu, X., Bartkowski, J. P., & Ogland, C. P. (2014). Intimate Partner Violence Against Married Women in Uganda. <i>Journal of Family Violence</i> , 29(8), 869–879.                                                                                        | Risk factors for married women's experience of IPV.                   | Physical, sexual, psychological | Partner        | Individual/relational     | Women n= 2,087  |
|                                                     | Tumwesigye, N. M., Kyomuhendo, G. B., Greenfield, T. K., & Wanyenze, R. K. (2012). Problem drinking and physical intimate partner violence against women: evidence from a national survey in Uganda. <i>BMC Public Health</i> , 12(1), 399.                             | Men's alcohol use and women's experience of IPV.                      | Physical                        | Partner        | Individual/relational     |                 |
|                                                     | Speizer, I. S. (2010). Intimate partner violence attitudes and experience among women and men in Uganda. <i>Journal of Interpersonal Violence</i> , 25(7), 1224–1241.                                                                                                   | IPV attitudes and experience among men and women.                     | Physical, sexual                | Partner        | Individual/relational     |                 |
| <b>DHS 2011</b><br>Quantitative;<br>cross-sectional | Kadengye, D. T., Iddi, S., Hunter, L., & McCoy, S. I. (2019). Effectiveness of Potential Interventions to Change Gendered Social Norms on Prevalence of Intimate Partner Violence in Uganda: a Causal Inference Approach. <i>Prevention Science</i> , 20(7), 1043–1053. | Causal inference approach to changing gendered social norms and IPV.  | Physical, sexual, psychological | Partner        | Community                 | Women n = 2,056 |
|                                                     | Zegenhagen, S., Ranganathan, M., & Buller, A. M. (2019). Household decision-making and its association with intimate partner violence: Examining differences in men's and women's perceptions in Uganda. <i>SSM - Population Health</i> , 8, 100442.                    | Men's and women's household decision-making and IPV experience.       | Physical                        | Partner        | Individual/relational     |                 |
|                                                     | Odimegwu, C., & Frade, S. (2018). The influence of adolescent age at first union on physical intimate partner violence and fertility in Uganda: A path analysis. <i>SAJCH South African Journal of Child Health</i> , 12(Special Issue), S51–S56.                       | Age at first union, IPV experience and fertility among women.         | Physical                        | Partner        | Individual/relational     |                 |
|                                                     | Wandera, S. O., Kwagala, B., Ndugga, P., & Kabagenyi, A. (2015). Partners' controlling behaviors and intimate partner sexual violence among married women in Uganda Global health. <i>BMC Public Health</i> , 15(1).                                                    | Partner's controlling behaviour and women's experience of sexual IPV. | Sexual                          | Partner        | Individual/relational     |                 |
|                                                     | Kwagala, B., Wandera, S. O., Ndugga, P., & Kabagenyi, A. (2013). Empowerment, partner's behaviours and intimate partner physical violence among married women in Uganda. <i>BMC Public Health</i> , 13(1).                                                              | Empowerment, partner's behaviour and women's IPV experience.          | Physical                        | Partner        | Individual/relational     |                 |
| <b>DHS 2016</b><br>Quantitative;<br>cross-sectional | Gubi, D., Nansubuga, E., & Wandera, S. O. (2020). Correlates of intimate partner violence among married women in Uganda: a cross-sectional survey. <i>BMC Public Health</i> , 20(1).                                                                                    | Risk factors for IPV experience among women.                          | Physical, sexual, psychological | Partner        | Individual/relational     | Women n= 9,319  |
|                                                     | Amegbor, P. M., & Pascoe, L. (2019). Variations in Emotional, Sexual, and Physical Intimate Partner Violence Among Women in Uganda: A Multilevel Analysis. <i>Journal of</i>                                                                                            | National variations in risk factors for IPV.                          | Physical, sexual, psychological | Partner        | Regional                  |                 |



**Supplementary material:****Risk factors for violence against women in high-prevalence settings: A mixed methods systematic review and meta-synthesis**

| Study name/<br>design                                                                             | Reference                                                                                                                                                                                                                                  | Focus                                                                      | VAW type(s)                     | Perpetrator(s) | Highest level of analysis | Sample                          |
|---------------------------------------------------------------------------------------------------|--------------------------------------------------------------------------------------------------------------------------------------------------------------------------------------------------------------------------------------------|----------------------------------------------------------------------------|---------------------------------|----------------|---------------------------|---------------------------------|
|                                                                                                   | <i>Interpersonal Violence</i> . Online.<br>Amegbor, P. M., & Rosenberg, M. W. (2019). What geography can tell us? Effect of higher education on intimate partner violence against women in Uganda. <i>Applied Geography</i> , 106, 71–81.  | Geographical variation in effect of higher education on IPV.               | Physical, sexual, psychological | Partner        | District                  |                                 |
| <b>DHS 2006 and 2011</b><br>Quantitative;<br>cross-sectional                                      | Valentine, A., Akobirshoev, I., & Mitra, M. (2019). Intimate Partner Violence among Women with Disabilities in Uganda. <i>International Journal of Environmental Research and Public Health</i> , 16(6), 947.                              | Disability and risk of IPV among women.                                    | Physical, sexual, psychological | Partner        | Individual/<br>relational | Women n= 8,592                  |
| <b>CRANE survey 2012</b><br>Quantitative;<br>cross-sectional)                                     | Schwitters, A., Swaminathan, M., Serwadda, D., et al. (2015). Prevalence of Rape and Client-Initiated Gender-Based Violence Among Female Sex Workers: Kampala, Uganda, 2012. <i>AIDS and Behavior</i> , 19(1), 68–76.                      | Prevalence of rape and client-initiated violence among female sex workers. | Sexual, psychological, economic | Client         | Individual/<br>relational | Women n= 1,467                  |
| <b>Essential Child Health and Nutrition Project in Uganda</b><br>Quantitative;<br>cross-sectional | Karamagi, C. A. S., Tumwine, J. K., Tylleskar, T., & Heggenhougen, K. (2006). Intimate partner violence against women in eastern Uganda: Implications for HIV prevention. <i>BMC Public Health</i> , 6.                                    | Risk factors for IPV among women.                                          | Physical, sexual                | Partner        | Individual/<br>relational | Women n= 457                    |
| <b>Gulu Sexual Health Project 2012</b><br>Quantitative;<br>cross-sectional                        | Erickson, M., Goldenberg, S. M., Muzaaya, G., et al. (2017). Interpersonal and structural contexts of intimate partner violence among female sex workers in conflict-affected northern Uganda. <i>Women &amp; Health</i> . 58(7), 759-773. | Risk factors for IPV among female sex workers.                             | Physical, sexual                | Partner        | Individual/<br>relational | Women n= 379                    |
| <b>Rakai Community Open Cohort Study data 2000 – 2018</b><br>Quantitative;<br>cross-sectional     | Zablotska, I. B., Gray, R. H., Koenig, M. A., et al. (2009). Alcohol use, intimate partner violence, sexual coercion and HIV among women aged 15-24 in Rakai, Uganda. <i>AIDS and Behavior</i> , 13(2), 225–233.                           | Alcohol use, IPV, sexual coercion and HIV among women.                     | Physical, sexual                | Partner        | Individual/<br>relational | Women n= 15,081<br>Men n= 6,531 |
|                                                                                                   | Kouyoumdjian, F. G., Calzavara, L. M., Bondy, et al. (2013). Risk factors for intimate partner violence in women in the Rakai Community Cohort Study, Uganda, from 2000 to 2009. <i>BMC Public Health</i> , 13(1), 566.                    | Risk factors for IPV experience among women.                               | Physical, sexual, psychological | Partner        | Individual/<br>relational |                                 |
|                                                                                                   | Sabri, B., Wirtz, A. L., Ssekasanvu, J., et al. (2019). Intimate partner violence, HIV and sexually transmitted infections in fishing, trading and agrarian communities in Rakai, Uganda. <i>BMC Public Health</i> , 19(1), 1–16.          | IPV, HIV and sexually transmitted infections among men and women.          | Physical, sexual                | Partner        | Individual/<br>relational |                                 |
|                                                                                                   | Miller, A. P., Pitpitan, E. v., Nabukalu, D., et al. (2020). Transactional Sex, Alcohol Use and Intimate Partner Violence Against Women in the Rakai Region of Uganda. <i>AIDS and</i>                                                     | Transactional sex, alcohol use and IPV experience among                    | Physical, sexual, psychological | Partner        | Individual/<br>relational |                                 |

**Supplementary material:****Risk factors for violence against women in high-prevalence settings: A mixed methods systematic review and meta-synthesis**

| Study name/design                                                                                       | Reference                                                                                                                                                                                                                                                                                          | Focus                                                                                       | VAW type(s)                     | Perpetrator(s) | Highest level of analysis | Sample                   |
|---------------------------------------------------------------------------------------------------------|----------------------------------------------------------------------------------------------------------------------------------------------------------------------------------------------------------------------------------------------------------------------------------------------------|---------------------------------------------------------------------------------------------|---------------------------------|----------------|---------------------------|--------------------------|
|                                                                                                         | <i>Behavior.</i>                                                                                                                                                                                                                                                                                   | women.                                                                                      |                                 |                |                           |                          |
| <b>SASA! Trial 2007 – 2012</b><br>Quantitative; cross-sectional                                         | Abramsky, T., Devries, K. M., Michau, L. et al. (2016). Ecological pathways to prevention: How does the SASA! community mobilisation model work to prevent physical intimate partner violence against women? <i>BMC Public Health</i> , 16(1), 339.                                                | Community mobilisation intervention to prevent violence against women.                      | Physical, sexual                | Partner        | Community                 | Women n= 4,385           |
|                                                                                                         | Abramsky, T., Devries, K., Kiss, L., et al. (2014). Findings from the SASA! Study: a cluster randomized controlled trial to assess the impact of a community mobilization intervention to prevent violence against women and reduce HIV risk in Kampala, Uganda. <i>BMC Medicine</i> , 12(1), 122. | Community mobilisation intervention to prevent violence against women.                      | Physical                        | Partner        | Community                 |                          |
|                                                                                                         | Francisco, L. v. (2010). The synergy between intimate partner violence and HIV: baseline findings from the SASA! study, a cluster randomised controlled community trial in Kampala, Uganda. Thesis submitted to Johns Hopkins University, Baltimore, USA.                                          | Risk factors for IPV and HIV.                                                               | Physical, sexual, psychological | Partner        | Individual/relational     |                          |
| <b>SASA! Trial 2007 – 2012</b><br>Qualitative; in-depth interviews                                      | Kyegombe, N., Starmann, E., Devries, K. M., et al. (2014). "SASA! is the medicine that treats violence". Qualitative findings on how a community mobilisation intervention to prevent violence against women created change in Kampala, Uganda. <i>Global Health Action</i> , 7(1).                | How a community mobilisation intervention to prevent violence against women created change. | Physical, sexual, economic      | Partner        |                           | Women n= 20<br>Men n= 20 |
| <b>Survey of War Affected Youth</b><br>Qualitative; in-depth interviews                                 | Annan, J., & Brier, M. (2010). The risk of return: Intimate partner violence in Northern Uganda's armed conflict. <i>Social Science and Medicine</i> , 70(1), 152–159.                                                                                                                             | IPV during Northern Uganda's armed conflict.                                                | Physical, sexual, psychological | Partner        |                           | Women n= 21              |
| <b>Uganda AIDS Rural Treatment Outcomes (UARTO) cohort 2011 – 2015</b><br>Quantitative; cross-sectional | Young, C. R., Kaida, A., Kabakyenga, J., et al. (2018). Prevalence and correlates of physical and sexual intimate partner violence among women living with HIV in Uganda. <i>PLoS ONE</i> , 13(8).                                                                                                 | Prevalence and risk factors for IPV among HIV positive women.                               | Physical, sexual                | Partner        | Individual/relational     | Women n= 455             |
|                                                                                                         | Conroy, A. A., Tsai, A. C., Clark, G. et al (2016). Relationship Power and Sexual Violence Among HIV-Positive Women in Rural Uganda. <i>AIDS and Behavior</i> , 20(9), 2045–2053.                                                                                                                  | Relationship and IPV among HIV positive women.                                              | Sexual                          | Partner        | Individual/relational     |                          |
| <b>Uganda national survey of HIV-infected women in care 2016</b><br>Quantitative;                       | Kabwama, S. N., Bukonya, J., Matovu, J. K. B. et al. (2019). Intimate partner violence among HIV positive women in care - Results from a national survey, Uganda 2016. <i>BMC Women's Health</i> , 19(1).                                                                                          | Risk factors for IPV among HIV positive women in care.                                      | Physical, sexual                | Partner        | Individual/relational     | Women n= 5,198           |



**Supplementary material:****Risk factors for violence against women in high-prevalence settings: A mixed methods systematic review and meta-synthesis**

| Study name/design             | Reference                                                                                                                                                                                                                                                                                           | Focus                                                                                         | VAW type(s)                                             | Perpetrator(s)    | Highest level of analysis | Sample                     |
|-------------------------------|-----------------------------------------------------------------------------------------------------------------------------------------------------------------------------------------------------------------------------------------------------------------------------------------------------|-----------------------------------------------------------------------------------------------|---------------------------------------------------------|-------------------|---------------------------|----------------------------|
| cross-sectional               |                                                                                                                                                                                                                                                                                                     |                                                                                               |                                                         |                   |                           |                            |
| Quantitative; cross-sectional | Black, E., Worth, H., Clarke, S., et al. (2019). Prevalence and correlates of intimate partner violence against women in conflict affected northern Uganda: A cross-sectional study. <i>Conflict and Health</i> , 13(1).                                                                            | Prevalence and risk factors for IPV among women affected by conflict.                         | Physical, sexual, psychological                         | Partner           | Individual/relational     | Women n= 409               |
|                               | Eputai, J., Udho, S., Auma, A. G., & Nabirye, R. C. (2019). Intimate partner violence among pregnant women in Uganda. <i>African Journal of Midwifery and Women's Health</i> , 13(2), 1–5.                                                                                                          | Risk factors for IPV among pregnant women.                                                    | Physical, sexual, psychological                         | Partner           | Individual/relational     | Women n= 181               |
|                               | Logie, C. H., Okumu, M., Mwima, S., et al. (2019). Social ecological factors associated with experiencing violence among urban refugee and displaced adolescent girls and young women in informal settlements in Kampala, Uganda: A cross-sectional study. <i>Conflict and Health</i> , 13(1), 60.  | Risk factors for violence among urban refugee and displaced adolescent girls and young women. | Physical, sexual, psychological                         | Partner           | Community                 | Women n= 333               |
|                               | Mootz, J. J., Muhanguzi, F. K., Panko, P., Mangen, P. O., Wainberg, M. L., Pinsky, I., & Khoshnood, K. (2018). Armed conflict, alcohol misuse, decision-making, and intimate partner violence among women in Northeastern Uganda: a population level study. <i>Conflict and Health</i> , 12(1), 37. | Armed conflict, alcohol misuse, decision-making and IPV among women.                          | Physical, psychological                                 | Partner           | Individual/relational     | Women n= 605               |
|                               | Kinyanda, E., Weiss, H. A., Mungherera, Met al. (2016). Intimate partner violence as seen in post-conflict eastern Uganda: prevalence, risk factors and mental health consequences. <i>BMC International Health and Human Rights</i> , 16(1), 5.                                                    | Risk factors for IPV among women.                                                             | Physical, sexual, psychological                         | Partner           | Individual/relational     | Women n= 1,110             |
|                               | Lundberg, P., Nakasujja, N., Musisi, S., et al. (2015). Sexual risk behavior, sexual violence, and HIV in persons with severe mental illness in Uganda: Hospital-based cross-sectional study and national comparison data. <i>American Journal of Public Health</i> , 105(6), 1142–1148.            | Sexual risk behaviour, sexual violence and HIV among people with mental illness.              | Sexual                                                  | Partner, stranger | Individual/relational     | Women n= 602               |
|                               | Anyango, J. F., & Muliira, J. K. (2009). Intimate partner violence among pregnant women in rural Uganda. <i>African Journal of Midwifery and Women's Health</i> , 3(4), 187–192.                                                                                                                    | Risk factors for IPV among pregnant women.                                                    | Physical, sexual, psychological                         | Partner           | Individual/relational     | Women n= 120               |
|                               | Saile, R., Neuner, F., Ertl, V., & Catani, C. (2013). Prevalence and predictors of partner violence against women in the aftermath of war: A survey among couples in Northern Uganda. <i>Social Science and Medicine</i> , 86, 17–25.                                                               | Prevalence and risk factors for IPV among women.                                              | Physical, sexual, psychological, controlling behaviours | Partner           | Individual/relational     | Women n= 235<br>Men n= 235 |
|                               | Shuaib, F. M. B., Ehiri, J. E., Jolly, P., Zhang, Q., Emusu, D., Ngu, J., Foushee, H., Katongole, D., Kirby, R., & Wabwire-                                                                                                                                                                         | Risk factors for IPV among women in HIV                                                       | Sexual                                                  | Partner           | Individual/relational     | Women n= 250               |

**Supplementary material:****Risk factors for violence against women in high-prevalence settings: A mixed methods systematic review and meta-synthesis**

| Study name/design                    | Reference                                                                                                                                                                                                                                                     | Focus                                                                  | VAW type(s)                               | Perpetrator(s)         | Highest level of analysis | Sample                                             |
|--------------------------------------|---------------------------------------------------------------------------------------------------------------------------------------------------------------------------------------------------------------------------------------------------------------|------------------------------------------------------------------------|-------------------------------------------|------------------------|---------------------------|----------------------------------------------------|
|                                      | Mangen, F. (2012). Sexual violence and associated factors among women in HIV discordant and concordant relationships in Uganda. <i>International Journal of Adolescent Medicine and Health</i> , 24(2), 125–133.                                              | concordant and discordant unions.                                      |                                           |                        |                           |                                                    |
|                                      | Agardh, A., Tumwine, G., Asamoah, B. O., & Cantor-Graae, E. (2012). The Invisible Suffering: Sexual Coercion, Interpersonal Violence, and Mental Health - A Cross-Sectional Study among University Students in South-Western Uganda. <i>PLoS ONE</i> , 7(12). | Risk factors for sexual violence among female university students.     | Sexual                                    | Partner, stranger      | Individual/relational     | Women n= 633                                       |
|                                      | Osinde, M. O., Kaye, D. K., & Kakaire, O. (2011). Intimate partner violence among women with HIV infection in rural Uganda: Critical implications for policy and practice. <i>BMC Women's Health</i> , 11(1), 50.                                             | Risk factors for IPV among HIV positive women.                         | Physical, sexual, psychological           | Partner                | Individual/relational     | Women n= 317                                       |
|                                      | Maclachlan, E., Neema, S., Luyirika, E., et al. (2009). Women, economic hardship and the path of survival: HIV/AIDS risk behavior among women receiving HIV/AIDS treatment in Uganda. <i>AIDS Care</i> , 21(3), 355–367.                                      | Economic hardship, HIV and IPV among women receiving HIV treatment.    | Sexual                                    | Partner, stranger      | Individual/relational     | Women n= 377                                       |
|                                      | Koenig, M. A., Lutalo, T., Zhao, F., et al. (2003). Domestic violence in rural Uganda: Evidence from a community-based study. <i>Bulletin of the World Health Organization</i> , 81(1), 53–60.                                                                | Risk factors for IPV among women.                                      | Physical, psychological                   | Partner                | Individual/relational     | Women n= 5,109                                     |
| Quantitative; prospective cohort     | Emusu, D. (2007). <i>Sexual Violence and Correlates Among Women in HIV Discordant Union</i> . University of Alabama at Birmingham.                                                                                                                            | Risk factors for sexual violence among women in HIV discordant unions. | Sexual                                    | Partner                | Individual/relational     | Women n= 250                                       |
| Qualitative; in-depth interviews     | Lundberg, P., Johansson, E., Okello, E., et al. (2012). Sexual risk behaviours and sexual abuse in persons with severe mental illness in Uganda: A qualitative study. <i>PLoS ONE</i> , 7(1).                                                                 | Sexual risk behaviour and abuse in people with mental illness.         | Sexual                                    | Partner, stranger      |                           | Men n= 20                                          |
|                                      | Hague, G., Thiara, R. K., & Turner, A. (2011). Bride-price and its links to domestic violence and poverty in Uganda: A participatory action research study. <i>Women's Studies International Forum</i> , 34(6), 550–561.                                      | Bride-price and its links to domestic violence and poverty.            | Physical, psychological, sexual, economic | Partner, family member |                           | Women n= 170<br>Men n= 57<br>Key informants n = 27 |
|                                      | Emusu, D., Ivankova, N., Jolly, P., et al. (2009). Experience of sexual violence among women in HIV discordant unions after voluntary HIV counselling and testing: a qualitative critical incident study in Uganda. <i>AIDS Care</i> , 21(11), 1363–1370.     | Sexual violence among women in HIV discordant unions.                  | Sexual                                    | Partner                |                           | Women n= 26                                        |
| Qualitative; focus group discussions | Ager, A., Bancroft, C., Berger, E., & Stark, L. (2018). Local constructions of gender-based violence amongst IDPs in northern Uganda: analysis of archival data collected using a                                                                             | Constructions of gender-based violence among                           | Physical, sexual                          | Partner, stranger      |                           | FGDs n= 64 (breakdown of participants)             |

**Supplementary material:****Risk factors for violence against women in high-prevalence settings: A mixed methods systematic review and meta-synthesis**

| Study name/design                               | Reference                                                                                                                                                                                                                                          | Focus                                                                                     | VAW type(s)                               | Perpetrator(s)                   | Highest level of analysis | Sample                                                                 |
|-------------------------------------------------|----------------------------------------------------------------------------------------------------------------------------------------------------------------------------------------------------------------------------------------------------|-------------------------------------------------------------------------------------------|-------------------------------------------|----------------------------------|---------------------------|------------------------------------------------------------------------|
|                                                 | gender- and age-segmented participatory ranking methodology. <i>Conflict and Health</i> , 12(1), 10.                                                                                                                                               | internally displaced persons.                                                             |                                           |                                  |                           | not available)                                                         |
|                                                 | Mullinax, M., Higgins, J., Wagman, J., et al. (2013). Community understandings of and responses to gender equality and empowerment in Rakai, Uganda. <i>Global Public Health</i> , 8(4), 465–478.                                                  | Community understandings of and responses to gender equality and empowerment.             | Not specified                             | Partner                          |                           | Women n= 48<br>Men n= 46                                               |
|                                                 | Cash, K. (2011). What's shame got to do with it: forced sex among married or steady partners in Uganda. <i>African Journal of Reproductive Health</i> , 15(3), 25–40.                                                                              | Forced sex among married or steady partners in Uganda.                                    | Sexual                                    | Partner                          |                           | Women n= 202<br>Men n= 248                                             |
| Qualitative; combination of methods             | Kwiringira, J. N., Mutabazi, M. M., Mugumya, F., et al. (2018). Experiences of Gender Based Violence among Refugee Populations in Uganda: Evidence from Four Refugee Camps. <i>Eastern Africa Social Science Research Review</i> , 34(1), 291–311. | Experiences of gender-based violence among refugee populations.                           | Physical, sexual, psychological, economic | Partner, family member, stranger |                           | Women n= 16<br>FGDs with men and women n= 20 (breakdown not available) |
|                                                 | Mootz, J. J., Stabb, S. D., & Mollen, D. (2017). Gender-Based Violence and Armed Conflict. <i>Psychology of Women Quarterly</i> , 41(3), 368–388.                                                                                                  | Gender-based violence and armed conflict.                                                 | Physical, sexual, psychological, economic | Partner, family members          |                           | Women n= 34<br>Men n = 43                                              |
|                                                 | Namy, S., Carlson, C., O'Hara, K., et al. (2017). Towards a feminist understanding of intersecting violence against women and children in the family. <i>Social Science and Medicine</i> , 184, 40–48.                                             | Feminist understanding of intersecting violence against women and children in the family. | Physical                                  | Partner                          |                           | Women n= 28<br>Men n= 27                                               |
|                                                 | Kaye, D. K., Mirembe, F., Ekstrom, A., et al. (2005). Implications of bride price on domestic violence and reproductive health in Wakiso District, Uganda. <i>African Health Sciences</i> , 5(4), 300–303.                                         | Bride price and domestic violence in Wakiso district, Uganda.                             | Physical, sexual                          | Partner                          |                           | FGDs n= 10 (breakdown not available)<br>Key informants n= 12           |
|                                                 | Kaye, D. K., Mirembe, F., Ekstrom, A. et al. (2005). The social construction and context of domestic violence in Wakiso District, Uganda. <i>Culture, Health and Sexuality</i> , 7(6), 625–635.                                                    | The social construction and context of domestic violence in Wakiso district, Uganda.      | Physical, sexual, psychological           | Partner                          |                           | FGDs n= 10 (breakdown not available)                                   |
| <b>Vanuatu</b>                                  |                                                                                                                                                                                                                                                    |                                                                                           |                                           |                                  |                           |                                                                        |
| <b>Vanuatu National Survey on Women's Lives</b> | Vanuatu National Statistics Office. (2011). <i>Vanuatu National Survey on Women's Lives and Family Relationships</i> . Vanuatu Women's Centre. Port Villa, Vanuatu.                                                                                | Risk factors for IPV experience among women.                                              | Physical, sexual                          | Partner                          | Individual/relational     | Women n= 2,337                                                         |

**Supplementary material:****Risk factors for violence against women in high-prevalence settings: A mixed methods systematic review and meta-synthesis**

| Study name/<br>design                                                                              | Reference                                                                                                                                                                                                                                                            | Focus                                                                              | VAW type(s)                                             | Perpetrator(s)         | Highest level of analysis | Sample                     |
|----------------------------------------------------------------------------------------------------|----------------------------------------------------------------------------------------------------------------------------------------------------------------------------------------------------------------------------------------------------------------------|------------------------------------------------------------------------------------|---------------------------------------------------------|------------------------|---------------------------|----------------------------|
| <b>and Family Relationships</b><br>Quantitative;<br>cross-sectional                                |                                                                                                                                                                                                                                                                      |                                                                                    |                                                         |                        |                           |                            |
| Quantitative;<br>cross-sectional                                                                   | McKelvie, S., Leodoro, B., Sala, T., Tran, T., & Fisher, J. (2020). Prevalence, Patterns, and Determinants of Intimate Partner Violence Experienced by Women Who Are Pregnant in Sanma Province, Vanuatu. <i>Journal of Interpersonal Violence</i> , online.         | Prevalence and risk factors for IPV among pregnant women.                          | Physical, sexual, psychological, controlling behaviours | Partner                | Individual/relational     | Women n= 192               |
| <b>Zambia</b>                                                                                      |                                                                                                                                                                                                                                                                      |                                                                                    |                                                         |                        |                           |                            |
| <b>DHS 2001</b><br>Quantitative;<br>cross-sectional                                                | Okenwa, L., & Lawoko, S. (2010). Social indicators and physical abuse of women by intimate partners: A study of women in Zambia. <i>Violence and Victims</i> , 25(2), 278–288.                                                                                       | Risk factors for IPV among women.                                                  | Physical                                                | Partner                | Individual/relational     | Women n= 5,029             |
|                                                                                                    | Klomegah, R. Y. (2008). Intimate Partner Violence (IPV) in Zambia: An Examination of Risk Factors and Gender Perceptions. <i>Journal of Comparative Family Studies</i> , 39(4), 557–569.                                                                             | Risk factors for IPV among women.                                                  | Physical                                                | Partner                | Individual/relational     |                            |
| <b>DHS 2007</b><br>Quantitative;<br>cross-sectional                                                | Shinabarger Reed, C. K., (2010). <i>Intimate Partner Violence and Infertility in Zambia</i> . Texas Woman's University, Denton, Texas.                                                                                                                               | Infertility and IPV among women.                                                   | Physical, sexual, psychological                         | Partner                | Individual/relational     | Women n= 5,029             |
| <b>Zambia Emory HIV Research Project 2012 – 2015</b><br>Quantitative;<br>cross-sectional           | Malama, K., Sagaon-Teyssier, L., Parker, R., (2019). Client-Initiated Violence Against Zambian Female Sex Workers: Prevalence and Associations With Behavior, Environment, and Sexual History. <i>Journal of Interpersonal Violence</i> . Online.                    | Prevalence and risk factors of client-initiated violence among female sex-workers. | Physical                                                | Clients                | Individual/relational     | Women n= 419               |
| <b>Maternity waiting home intervention 2016</b><br>(quantitative;<br>cross-sectional)              | Munro-Kramer, M. L., Scott, N., Boyd, C. J., Veliz, P. T., Murray, S. M., Musonda, G., & Lori, J. R. (2018). Postpartum physical intimate partner violence among women in rural Zambia. <i>International Journal of Gynecology and Obstetrics</i> , 143(2), 199–204. | Risk factors for IPV experience among postpartum women.                            | Physical                                                | Partner                | Individual/relational     | Women n= 2,381             |
| <b>Stamping Out and Preventing Gender Based Violence in Zambia (STOP GBV)]</b><br>Qualitative; in- | Samuels, F., Ndubani, P., Walker, D., & Simbaya, J. (2015). <i>Baseline Study: Stamping Out and Preventing Gender Based Violence (STOP GBV) in Zambia</i> . Overseas Development Institute. London, UK.                                                              | Preventing gender-based violence.                                                  | Physical, psychological, economic                       | Partner, family member |                           | Women n= 116<br>Men n= 109 |

**Supplementary material:****Risk factors for violence against women in high-prevalence settings: A mixed methods systematic review and meta-synthesis**

| Study name/design                                                                                                  | Reference                                                                                                                                                                                                                                                                                          | Focus                                                                    | VAW type(s)                     | Perpetrator(s)         | Highest level of analysis | Sample                     |
|--------------------------------------------------------------------------------------------------------------------|----------------------------------------------------------------------------------------------------------------------------------------------------------------------------------------------------------------------------------------------------------------------------------------------------|--------------------------------------------------------------------------|---------------------------------|------------------------|---------------------------|----------------------------|
| depth interviews, FGDs                                                                                             |                                                                                                                                                                                                                                                                                                    |                                                                          |                                 |                        |                           |                            |
| <b>Violence and Alcohol Treatment Study Trial</b><br>Quantitative; cross-sectional                                 | Fine, S. L., Kane, J. C., Murray, S. M., et al. (2019). The Role of Violence Acceptance and Inequitable Gender Norms in Intimate Partner Violence Severity Among Couples in Zambia. <i>Journal of Interpersonal Violence</i> . Online.                                                             | Violence acceptance, gender norms and IPV severity among couples.        | Physical, sexual                | Partner                |                           | Women n= 247<br>Men n= 247 |
| Quantitative; cross-sectional                                                                                      | Birbeck, G., Chomba, E., Atadzhanov, et al. (2007). The social and economic impact of epilepsy in Zambia: a cross-sectional study. <i>The Lancet Neurology</i> , 39.                                                                                                                               | Epilepsy and risk of IPV among women.                                    | Physical, sexual                | Partner, family member | Individual/relational     | Women n= 338               |
| Qualitative; in-depth interviews                                                                                   | Sichimba, F., Cindy Nakazwe, K., & Phiri, T. (2020). Untold Stories of Women Living in Violence: Lived Realities of Why Women Stay: A Case Study of Ngombe and Kanyama Compounds in Lusaka. <i>Journal of Aggression, Maltreatment &amp; Trauma</i> , 29(7), 767–784.                              | Women's experiences of staying in violent relationships.                 | Physical, psychological         | Partner                |                           | Women n= 25                |
|                                                                                                                    | Murray, L. K., Haworth, A., Semrau, K., et al. (2006). Violence and abuse among HIV-infected women and their children in Zambia: A qualitative study. <i>Journal of Nervous and Mental Disease</i> , 194(8), 610–615.                                                                              | Violence and abuse among HIV-infected women and their children.          | Physical                        | Partner                |                           | Key informants n= 22       |
| Qualitative; combination of methods                                                                                | Murray, S. M., Skavenski Van Wyk, S., et al. (2021). A qualitative exploration of mechanisms of intimate partner violence reduction for zambian couples receiving the Common Elements Treatment Approach (CETA) intervention. <i>Social Science and Medicine</i> , 268.                            | Mechanisms of IPV reduction for couples receiving the CETA intervention. | Physical, sexual, psychological | Partner                |                           | Women n= 50<br>Men n= 50   |
| <b>Multi-country studies (including at least one high-prevalence setting)</b>                                      |                                                                                                                                                                                                                                                                                                    |                                                                          |                                 |                        |                           |                            |
| <b>GENACIS (Gender, Alcohol, and Culture: An International Study) 2000 – 2001</b><br>Quantitative; cross-sectional | Bernards, S., & Graham, K. (2013). The Cross-Cultural Association Between Marital Status and Physical Aggression Between Intimate Partners. <i>Journal of Family Violence</i> , 28(4), 403–418.                                                                                                    | Marital status and physical IPV among men and women.                     | Physical                        | Partner                | Individual/relational     | Women n= 657<br>Men n= 612 |
|                                                                                                                    | Graham, K., Bernards, S., Wilsnack, S. C., & Gmel, G. (2011). Alcohol may not cause partner violence but it seems to make it worse: A cross national comparison of the relationship between alcohol and severity of partner violence. <i>Journal of Interpersonal Violence</i> , 26(8), 1503–1523. | Alcohol use and severity of IPV among men and women.                     | Physical                        | Partner                | Individual/relational     |                            |
| Qualitative; focus-group discussions                                                                               | Holmila, M., Beccaria, F., Ibanga, A., Graham, K., Hettige, S., Magri, R., Munné, M., Plant, M., Rolando, S., & Tumwesigye, N. (2014). Gender, alcohol and intimate partner violence: Qualitative comparative study. <i>Drugs: Education, Prevention</i>                                           | Gender, alcohol and intimate partner violence.                           | Physical, psychological         | Partner                |                           | Women n= 7<br>Men n= 6     |

**Supplementary material:****Risk factors for violence against women in high-prevalence settings: A mixed methods systematic review and meta-synthesis**

| Study name/<br>design                                                                                 | Reference                                                                                                                                                                                                                                                                            | Focus                                           | VAW type(s)                           | Perpetrator(s) | Highest level of analysis | Sample                                                                                                                                                                                                                                                                    |
|-------------------------------------------------------------------------------------------------------|--------------------------------------------------------------------------------------------------------------------------------------------------------------------------------------------------------------------------------------------------------------------------------------|-------------------------------------------------|---------------------------------------|----------------|---------------------------|---------------------------------------------------------------------------------------------------------------------------------------------------------------------------------------------------------------------------------------------------------------------------|
|                                                                                                       | <i>and Policy</i> , 21(5), 398–407.                                                                                                                                                                                                                                                  |                                                 |                                       |                |                           |                                                                                                                                                                                                                                                                           |
| <b>International Men and Gender Equality Survey (IMAGES) 2012</b><br>Quantitative;<br>cross-sectional | Flemming, P. J., Mc-Cleary-Sills, J., Morton, et al. (2015). Risk Factors for Men's Lifetime Perpetration of Physical Violence against Intimate Partners: Results from the International Men and Gender Equality Survey (IMAGES) in Eight Countries. <i>PloS One</i> , 10(5).        | Risk factors for men's IPV perpetration.        | Physical                              | Partner        | Individual/<br>relational | Men n= 539                                                                                                                                                                                                                                                                |
| <b>DHS datasets</b><br>Quantitative;<br>cross-sectional                                               | Akinyemi, J. O., Somefun, O., Olamijuwon, E. O., de Wet, N., & Odimegwu, C. O. (2020). How long was the honeymoon? Accelerated failure time model of spousal violence onset among women in sub-Saharan Africa. <i>Women &amp; Health</i> , 60(9), 987–999.                           | Accelerated failure time model of onset of IPV. | Physical                              | Partner        | Individual/<br>relational | All women<br>Tanzania<br>n=5,795<br>Uganda n=<br>5,504<br>Zambia n=<br>5,437<br>Burundi n=<br>5,839                                                                                                                                                                       |
|                                                                                                       | Coll, C. V. N., Ewerling, F., García-Moreno, C., Hellwig, F., & Barros, A. J. D. (2020). Intimate partner violence in 46 low-income and middle-income countries: an appraisal of the most vulnerable groups of women using national health surveys. <i>BMJ Global Health</i> , 5(1). | Risk factors for IPV among women in 46 LMICs.   | Physical,<br>sexual,<br>psychological | Partner        | Individual/r<br>elational | All women<br>DRC n=5,691<br>Cameroon n=<br>4,006<br>Sierra Leone<br>n= 4,315<br>Tanzania n=<br>7,597<br>Uganda n=<br>7,536<br>Zambia n=<br>9,416<br>Angola n=<br>7,669<br>Afghanistan<br>n= 21,324<br>Timor Leste<br>n= 3,694<br>Gabon n=<br>4,147<br>Burundi n=<br>7,366 |
|                                                                                                       | Epstein, A., Bendavid, E., Nash, D., Charlebois, E. D., &                                                                                                                                                                                                                            | Drought and IPV                                 | Physical,                             | Partner        | Societal                  | All women                                                                                                                                                                                                                                                                 |

**Supplementary material:****Risk factors for violence against women in high-prevalence settings: A mixed methods systematic review and meta-synthesis**

| Study name/design | Reference                                                                                                                                                                                                                                             | Focus                                                                        | VAW type(s)                     | Perpetrator(s)       | Highest level of analysis | Sample                                                                                                                                                                |
|-------------------|-------------------------------------------------------------------------------------------------------------------------------------------------------------------------------------------------------------------------------------------------------|------------------------------------------------------------------------------|---------------------------------|----------------------|---------------------------|-----------------------------------------------------------------------------------------------------------------------------------------------------------------------|
|                   | Weiser, S. D. (2020). Drought and intimate partner violence towards women in 19 countries in sub-saharan Africa during 2011-2018: A population-based study. <i>PLoS Medicine</i> , 17(3).                                                             | among women in 19 countries in sub-Saharan Africa.                           | sexual, psychological           |                      |                           | Zambia n=7,577<br>Burundi n=6,364<br>Cameroon n=3,396<br>DRC n=4,557<br>Gabon n=3,112<br>Sierra Leone n=3,877<br>Tanzania n=6,452<br>Uganda n=6,119<br>Angola n=6,004 |
|                   | Kiwuwa-Muyingo, S., & Kadengye, D. T. (2020). Prevalence and Risk Factors for Women's Reports of Past-Year Intimate Partner Violence: A Comparative Analysis of Six East African National Surveys. <i>Journal of Interpersonal Violence</i> . Online. | Prevalence and risk factors for IPV among women in 6 East African countries. | Physical, sexual, psychological | Partner              | Individual/relational     | All women Uganda n=7,536<br>Burundi n=7,366<br>Tanzania n=7,597                                                                                                       |
|                   | Wilson, N. (2019). Socio-economic Status, Demographic Characteristics and Intimate Partner Violence. <i>Journal of International Development</i> , 31(7), 632–657.                                                                                    | Socio-economic status, demographic characteristics and IPV among women.      | Physical, sexual, psychological | Partner              | Individual/relational     | Not provided for individual countries included in study                                                                                                               |
|                   | Behrman, J. A., Peterman, A., & Palermo, T. (2017). Does Keeping Adolescent Girls in School Protect Against Sexual Violence? Quasi-Experimental Evidence From East and Southern Africa. <i>Journal of Adolescent Health</i> , 60(2), 184–190.         | Protective effect of girls' education on experience of sexual violence.      | Sexual                          | Partner and stranger | Individual/relational     | Women n=1,028                                                                                                                                                         |
|                   | Cools, S., & Kotsadam, A. (2017). Resources and Intimate Partner Violence in Sub-Saharan Africa. <i>World Development</i> , 95, 211–230.                                                                                                              | Resources and IPV among women in sub-Saharan Africa.                         | Physical, sexual                | Partner              | Society                   | Not provided for individual countries included in study                                                                                                               |
|                   | Decker, M. R., Latimore, A. D., Yasutake, S., et al. (2015).                                                                                                                                                                                          | Age and IPV among                                                            | Physical,                       | Partner              | Individual/r              | All women                                                                                                                                                             |



**Supplementary material:****Risk factors for violence against women in high-prevalence settings: A mixed methods systematic review and meta-synthesis**

| Study name/<br>design                                                       | Reference                                                                                                                                                                                                                                                  | Focus                                                                | VAW type(s)                     | Perpetrator(s)                   | Highest level of analysis | Sample                                                                                                                                                                                                |
|-----------------------------------------------------------------------------|------------------------------------------------------------------------------------------------------------------------------------------------------------------------------------------------------------------------------------------------------------|----------------------------------------------------------------------|---------------------------------|----------------------------------|---------------------------|-------------------------------------------------------------------------------------------------------------------------------------------------------------------------------------------------------|
|                                                                             | Gender-based violence against adolescent and young adult women in low- and middle-income countries. <i>Journal of Adolescent Health</i> , 56(2), 188–196.                                                                                                  | adolescent and young adult women in LMICs.                           | sexual                          |                                  | relational                | Tanzania n=2,249<br>Uganda n=723<br>Zambia n=1,756<br>Cameroon n=1,388<br>DRC n=1,339<br>Liberia n=1,342<br>Sao Tome and Principe n=586<br>Bangladesh n=2,840<br>Timor-Leste n=640<br>Bolivia n=3,470 |
|                                                                             | Bamiwuye, S. O., & Odimegwu, C. (2014). Spousal violence in sub-Saharan Africa: Does household poverty-wealth matter? <i>Reproductive Health</i> , 11(1).                                                                                                  | Household poverty-wealth and IPV in sub-Saharan Africa.              | Physical, sexual, psychological | Partner                          | Individual/relational     | All women<br>Cameroon n=3,691<br>Zambia n=3,010                                                                                                                                                       |
|                                                                             | Bott, S., Guedes, A., Goodwin, M., & Adams Mendoza, J. (2012). <i>Violence Against Women in Latin America and the Caribbean: A comparative analysis of population-based data from 12 countries</i> . Pan American Health Organization. Washington DC, USA. | Risk factors for IPV among women in Latin America and the Caribbean. | Physical, sexual                | Partner                          | Individual/relational     | Not provided for individual countries included in study                                                                                                                                               |
|                                                                             | Alio, A. P., Clayton, H. B., Garba, M., et al. (2011). Spousal Concordance in Attitudes Toward Violence and Reported Physical Abuse in African Couples. <i>Journal of Interpersonal Violence</i> , 26(14), 2790–2810.                                      | Spousal concordance in attitudes towards VAW and physical IPV.       | Physical                        | Partner                          | Individual/relational     | Not provided for individual countries included in study                                                                                                                                               |
| <b>Violence against children survey</b><br>Quantitative;<br>cross-sectional | Stark, L., Seff, I., Hoover, A., Gordon, R., Ligiero, D., & Massetti, G. (2019). Sex and age effects in past-year experiences of violence amongst adolescents in five countries. <i>PLoS ONE</i> , 14(7).                                                  | Age and sex effects on violence among young people.                  | Physical, sexual                | Partner, family member, stranger | Individual/relational     | Women n=1,968<br>Men n=1,771                                                                                                                                                                          |
| <b>WHO Multi-</b>                                                           | Stöckl, H., March, L., Pallitto, C., & Garcia-Moreno, C. (2014).                                                                                                                                                                                           | Prevalence and risk                                                  | Physical,                       | Partner                          | Individual/               | Bangladesh                                                                                                                                                                                            |



**Supplementary material:****Risk factors for violence against women in high-prevalence settings: A mixed methods systematic review and meta-synthesis**

| Study name/design                                                                                                    | Reference                                                                                                                                                                                                                                                                                                                                 | Focus                                                                          | VAW type(s)                               | Perpetrator(s)             | Highest level of analysis | Sample                                |
|----------------------------------------------------------------------------------------------------------------------|-------------------------------------------------------------------------------------------------------------------------------------------------------------------------------------------------------------------------------------------------------------------------------------------------------------------------------------------|--------------------------------------------------------------------------------|-------------------------------------------|----------------------------|---------------------------|---------------------------------------|
| <b>Country Study on Women's Health and Domestic Violence against Women 2000 – 2004</b> Quantitative; cross-sectional | Intimate partner violence among adolescents and young women: Prevalence and associated factors in nine countries: A cross-sectional study. <i>BMC Public Health</i> , 14(1).                                                                                                                                                              | factors for IPV among adolescents and young women in 9 countries.              | sexual                                    |                            | relational                | women n= 3,130                        |
|                                                                                                                      | Abramsky, T., Watts, C. H., Garcia-Moreno, et al. (2011). What factors are associated with recent intimate partner violence? findings from the WHO multi-country study on women's health and domestic violence. <i>BMC Public Health</i> , 11(1), 109.                                                                                    | Risk factors for IPV experience among women.                                   | Physical, sexual                          | Partner                    | Individual/relational     | Tanzania women n= 3,270               |
|                                                                                                                      | Garcia-Moreno, C., Jansen, H. A., Ellsberg, M., et al. (2006). Prevalence of intimate partner violence: findings from the WHO multi-country study on women's health and domestic violence. <i>Lancet</i> , 368(9543), 1260–1269.                                                                                                          | Prevalence of IPV among women.                                                 | Physical, sexual                          | Partner                    | Individual/relational     |                                       |
| Quantitative; cross-sectional                                                                                        | Chirwa, E., Jewkes, R., van der Heijden, I., & Dunkle, K. (2020). Intimate partner violence among women with and without disabilities: a pooled analysis of baseline data from seven violence-prevention programmes. <i>BMJ Global Health</i> , 5(11).                                                                                    | Disability and IPV experience among women.                                     | Physical, psychological, economic         | Partner                    | Individual/relational     | Women n= 933                          |
|                                                                                                                      | Instituto Nacional de Estadística Avenida. (2017). <i>Encuesta de prevalencia y características de la Violencia contra las mujeres 2016</i> . La Paz, Bolivia.                                                                                                                                                                            | Prevalence and risk factors for VAW.                                           | Physical, sexual, psychological, economic | Partner, stranger, manager | Individual/relational     | Not reported for individual countries |
|                                                                                                                      | Andersson, N., Ho-Foster, A., Mitchell, et al. (2007). Risk factors for domestic physical violence: national cross-sectional household surveys in eight southern African countries. <i>BMC Women's Health</i> , 7(1), 11.                                                                                                                 | Risk factors for IPV experience among women.                                   | Physical                                  | Partner                    | Individual/relational     | Women n= 1,605                        |
| Qualitative; in-depth interviews                                                                                     | Atim, L., Mwangoka, M., Martins, L., & Rickard, S. (2020). <i>Sexual and Gender-Based Violence in the Mining Sector in Africa. Evidence and reflections from the DRC, South Africa, Tanzania &amp; Uganda</i> . German Federal Ministry for Economic Cooperation and Development (BMZ).                                                   | Sexual and Gender-Based Violence in the Mining Sector in Africa.               | Physical, psychological, sexual, economic | Partner, stranger          |                           | 22 key informants                     |
| Qualitative; combination of methods                                                                                  | Falb, K., Asghar, K., Pardo, N. M., Hategekimana, J. D. D., Kakay, H., Roth, D., & O'Connor, M. (2020). Developing an Inclusive Conceptual Model for Preventing Violence in the Home in Humanitarian Settings: Qualitative Findings From Myanmar and the Democratic Republic of Congo. <i>Journal of Interpersonal Violence</i> . Online. | Conceptual model for preventing violence in the home in humanitarian settings. | Physical, sexual, psychological           | Partner, family members    |                           | Women n= 75<br>Men n= 73              |
|                                                                                                                      | Tanabe, M., Nagujjah, Y., Rimal, N., et al. (2015). Intersecting Sexual and Reproductive Health and Disability in Humanitarian Settings: Risks, Needs, and Capacities of Refugees with                                                                                                                                                    | Intersecting sexual and reproductive health and disability                     | Sexual                                    | Stranger                   |                           | Women n= 15<br>Men n=17               |

**Supplementary material:****Risk factors for violence against women in high-prevalence settings: A mixed methods systematic review and meta-synthesis**

| Study name/<br>design | Reference                                                                                   | Focus                     | VAW type(s) | Perpetrator(s) | Highest<br>level of<br>analysis                         | Sample |
|-----------------------|---------------------------------------------------------------------------------------------|---------------------------|-------------|----------------|---------------------------------------------------------|--------|
|                       | Disabilities in Kenya, Nepal, and Uganda. <i>Sexuality and Disability</i> , 33(4), 411–427. | in humanitarian settings. |             |                |                                                         |        |
|                       |                                                                                             |                           |             | <b>Total:</b>  | Women = 280,360<br>Men = 40,276<br>Key informants = 274 |        |

**Supplementary material:**

Risk factors for violence against women in high-prevalence settings: A mixed methods systematic review and meta-synthesis

**Table 7: Quality assessment, by first author**

| First author         | Aims and objectives | Research design | Process for producing findings | Data supports interpretation | Appropriate method of analysis | Additional comments |
|----------------------|---------------------|-----------------|--------------------------------|------------------------------|--------------------------------|---------------------|
| Abeid (2014)         | yes                 | yes             | yes                            | yes                          | yes                            |                     |
| Abramsky (2011)      | yes                 | yes             | yes                            | yes                          | yes                            |                     |
| Abramsky (2014)      | yes                 | yes             | yes                            | yes                          | yes                            |                     |
| Abramsky (2019)      | yes                 | yes             | yes                            | yes                          | yes                            |                     |
| Abramsky (2020)      | yes                 | yes             | yes                            | yes                          | yes                            |                     |
| Afiaz (2020)         | yes                 | yes             | yes                            | yes                          | yes                            |                     |
| Agardh (2012)        | yes                 | yes             | yes                            | yes                          | yes                            |                     |
| Ager (2018)          | yes                 | yes             | yes                            | yes                          | yes                            |                     |
| Ahmad (2018)         | yes                 | yes             | yes                            | yes                          | yes                            |                     |
| Akhter (2016)        | yes                 | yes             | yes                            | yes                          | yes                            |                     |
| Akhter (2020)        | yes                 | yes             | yes                            | yes                          | yes                            |                     |
| Akinyemi (2020)      | yes                 | yes             | yes                            | yes                          | yes                            |                     |
| Aklimunnessa (2007)  | yes                 | yes             | yes                            | yes                          | yes                            |                     |
| Aktaruzzaman (2020)  | yes                 | yes             | yes                            | yes                          | yes                            |                     |
| Alio (2011)          | yes                 | yes             | yes                            | yes                          | yes                            |                     |
| Allen (2012)         | yes                 | yes             | yes                            | yes                          | yes                            |                     |
| Alleyne-Green (2018) | yes                 | yes             | yes                            | yes                          | yes                            |                     |
| Alleyne-Green (2019) | yes                 | yes             | yes                            | yes                          | yes                            |                     |
| Aloyce (2020)        | yes                 | yes             | yes                            | yes                          | yes                            |                     |

**Supplementary material:**

Risk factors for violence against women in high-prevalence settings: A mixed methods systematic review and meta-synthesis

| First author       | Aims and objectives | Research design | Process for producing findings | Data supports interpretation | Appropriate method of analysis | Additional comments |
|--------------------|---------------------|-----------------|--------------------------------|------------------------------|--------------------------------|---------------------|
| Ambramsky (2016)   | yes                 | yes             | yes                            | yes                          | yes                            |                     |
| Amegbor (2019a)    | yes                 | yes             | yes                            | yes                          | yes                            |                     |
| Amegbor (2019b)    | yes                 | yes             | yes                            | yes                          | yes                            |                     |
| Amowitz (2002)     | yes                 | yes             | yes                            | yes                          | yes                            |                     |
| Andersson (2007)   | yes                 | yes             | yes                            | yes                          | yes                            |                     |
| Annan (2010)       | yes                 | yes             | yes                            | yes                          | yes                            |                     |
| Anwary (2015)      | yes                 | yes             | yes                            | yes                          | yes                            |                     |
| Anyango (2013)     | yes                 | yes             | yes                            | yes                          | yes                            |                     |
| Atim (2020)        | yes                 | yes             | yes                            | yes                          | yes                            |                     |
| Bajracharya (2013) | yes                 | yes             | yes                            | yes                          | yes                            |                     |
| Bamiwuye (2014)    | yes                 | yes             | yes                            | yes                          | yes                            |                     |
| Bartels (2010)     | yes                 | yes             | yes                            | yes                          | yes                            |                     |
| Bates (2004)       | yes                 | yes             | yes                            | yes                          | yes                            |                     |
| Behrman (2017)     | yes                 | yes             | yes                            | yes                          | yes                            |                     |
| Bernards (2013)    | yes                 | yes             | yes                            | yes                          | yes                            |                     |
| Bhuiya (2003)      | yes                 | yes             | yes                            | yes                          | yes                            |                     |
| Birbeck (2007)     | yes                 | yes             | yes                            | yes                          | yes                            |                     |
| Black (2019)       | yes                 | yes             | yes                            | yes                          | yes                            |                     |
| Bott (2012)        | yes                 | yes             | yes                            | yes                          | yes                            |                     |
| Camargo (2019)     | yes                 | yes             | yes                            | yes                          | yes                            |                     |
| Cash (2011)        | yes                 | yes             | yes                            | yes                          | yes                            |                     |

**Supplementary material:**

Risk factors for violence against women in high-prevalence settings: A mixed methods systematic review and meta-synthesis

| First author    | Aims and objectives | Research design | Process for producing findings | Data supports interpretation | Appropriate method of analysis | Additional comments |
|-----------------|---------------------|-----------------|--------------------------------|------------------------------|--------------------------------|---------------------|
| Chirwa (2020)   | yes                 | yes             | yes                            | yes                          | yes                            |                     |
| Chowdury (2018) | yes                 | yes             | yes                            | yes                          | yes                            |                     |
| Coll (2020)     | yes                 | yes             | yes                            | yes                          | yes                            |                     |
| Conroy (2016)   | yes                 | yes             | yes                            | yes                          | yes                            |                     |
| Cools (2017)    | yes                 | yes             | yes                            | yes                          | yes                            |                     |
| Crombach (2015) | yes                 | yes             | yes                            | yes                          | yes                            |                     |
| Dalal (2009)    | yes                 | yes             | yes                            | yes                          | yes                            |                     |
| Dalal (2013)    | yes                 | yes             | yes                            | yes                          | yes                            |                     |
| Das (2015)      | yes                 | yes             | yes                            | yes                          | yes                            |                     |
| De (2020)       | yes                 | yes             | yes                            | yes                          | yes                            |                     |
| Decker (2015)   | yes                 | yes             | yes                            | yes                          | yes                            |                     |
| DfID (2013)     | yes                 | yes             | yes                            | yes                          | yes                            |                     |
| Dugwen (2013)   | yes                 | yes             | yes                            | yes                          | yes                            |                     |
| Ehiri (2010)    | yes                 | yes             | yes                            | yes                          | yes                            |                     |
| Elbert (2013)   | yes                 | yes             | yes                            | yes                          | yes                            |                     |
| Emusu (2009)    | yes                 | yes             | yes                            | yes                          | yes                            |                     |
| Epstein (2020)  | yes                 | yes             | yes                            | yes                          | yes                            |                     |
| Epuitai (2019)  | yes                 | yes             | yes                            | yes                          | yes                            |                     |
| Erickson (2018) | yes                 | yes             | yes                            | yes                          | yes                            |                     |
| Eze (2019)      | yes                 | yes             | yes                            | yes                          | yes                            |                     |
| Falb (2020)     | yes                 | yes             | yes                            | yes                          | yes                            |                     |

**Supplementary material:**

Risk factors for violence against women in high-prevalence settings: A mixed methods systematic review and meta-synthesis

| First author                                       | Aims and objectives | Research design | Process for producing findings | Data supports interpretation | Appropriate method of analysis | Additional comments |
|----------------------------------------------------|---------------------|-----------------|--------------------------------|------------------------------|--------------------------------|---------------------|
| Fiji Women's Crisis Centre (2011)                  | yes                 | yes             | yes                            | yes                          | yes                            |                     |
| Fine (2019)                                        | yes                 | yes             | yes                            | yes                          | yes                            |                     |
| Fleming (2015)                                     | yes                 | yes             | yes                            | yes                          | yes                            |                     |
| Francisco (2010)                                   | yes                 | yes             | yes                            | yes                          | yes                            |                     |
| FSM Department of Health and Social Affairs (2014) | yes                 | yes             | yes                            | yes                          | yes                            |                     |
| Fulu (2013)                                        | yes                 | yes             | yes                            | yes                          | yes                            |                     |
| Garcia-Moreno (2006)                               | yes                 | yes             | yes                            | yes                          | yes                            |                     |
| Gibbs (2018)                                       | yes                 | yes             | yes                            | yes                          | yes                            |                     |
| Gibbs (2019)                                       | yes                 | yes             | yes                            | yes                          | yes                            |                     |
| Grabe (2015)                                       | yes                 | yes             | yes                            | yes                          | yes                            |                     |
| Graham (2010)                                      | yes                 | yes             | yes                            | yes                          | yes                            |                     |
| Gubi (2020)                                        | yes                 | yes             | yes                            | yes                          | yes                            |                     |
| Hague (2011)                                       | yes                 | yes             | yes                            | yes                          | yes                            |                     |
| Hamadani (2020)                                    | yes                 | yes             | yes                            | yes                          | yes                            |                     |
| Haque (2020)                                       | yes                 | yes             | yes                            | yes                          | yes                            |                     |
| Hasan (2014)                                       | yes                 | yes             | yes                            | yes                          | yes                            |                     |
| Heath (2014)                                       | yes                 | yes             | yes                            | yes                          | yes                            |                     |
| Hendrickson (2018)                                 | yes                 | yes             | yes                            | yes                          | yes                            |                     |
| Holmila (2014)                                     | yes                 | yes             | yes                            | yes                          | yes                            |                     |
| Human Rights Watch (2009a)                         | yes                 | yes             | yes                            | yes                          | yes                            |                     |
| Human Rights Watch (2009b)                         | yes                 | yes             | yes                            | yes                          | yes                            |                     |

**Supplementary material:**

Risk factors for violence against women in high-prevalence settings: A mixed methods systematic review and meta-synthesis

| First author                                     | Aims and objectives | Research design | Process for producing findings | Data supports interpretation | Appropriate method of analysis | Additional comments                                 |
|--------------------------------------------------|---------------------|-----------------|--------------------------------|------------------------------|--------------------------------|-----------------------------------------------------|
| Human Rights Watch (2013)                        | yes                 | yes             | yes                            | yes                          | yes                            |                                                     |
| Instituto Nacional de Estadística Avenida (2016) | yes                 | yes             | yes                            | yes                          | yes                            |                                                     |
| International Rescue Committee (2019)            | yes                 | yes             | yes                            | yes                          | yes                            |                                                     |
| Islam (2012)                                     | yes                 | yes             | yes                            | yes                          | yes                            |                                                     |
| Islam (2014)                                     | yes                 | yes             | yes                            | yes                          | yes                            |                                                     |
| Islam (2015)                                     | yes                 | yes             | yes                            | yes                          | yes                            |                                                     |
| Islam (2017)                                     | yes                 | yes             | yes                            | yes                          | yes                            |                                                     |
| Islam (2017)                                     | yes                 | yes             | yes                            | yes                          | yes                            |                                                     |
| Islam (2018)                                     | yes                 | yes             | yes                            | yes                          | yes                            |                                                     |
| Izugbara (2018)                                  | yes                 | yes             | no                             | no                           | yes                            | Unusually high odds ratios and confidence intervals |
| James-Hawkins (2018)                             | yes                 | yes             | yes                            | yes                          | yes                            |                                                     |
| Jewkes (2018)                                    | yes                 | yes             | yes                            | yes                          | yes                            |                                                     |
| Jewkes (2019)                                    | yes                 | yes             | yes                            | yes                          | yes                            |                                                     |
| Johnson (2009)                                   | yes                 | yes             | yes                            | yes                          | yes                            |                                                     |
| Kabwama (2019)                                   | yes                 | yes             | yes                            | yes                          | yes                            |                                                     |
| Kadengye (2019)                                  | yes                 | yes             | yes                            | yes                          | yes                            |                                                     |
| Kapiga (2017)                                    | yes                 | yes             | yes                            | yes                          | yes                            |                                                     |
| Karamagi (2006)                                  | yes                 | yes             | yes                            | yes                          | yes                            |                                                     |
| Karim (2007)                                     | yes                 | yes             | yes                            | yes                          | yes                            |                                                     |
| Karim (2012)                                     | yes                 | yes             | yes                            | yes                          | yes                            |                                                     |

**Supplementary material:**

Risk factors for violence against women in high-prevalence settings: A mixed methods systematic review and meta-synthesis

| First author          | Aims and objectives | Research design | Process for producing findings | Data supports interpretation | Appropriate method of analysis | Additional comments |
|-----------------------|---------------------|-----------------|--------------------------------|------------------------------|--------------------------------|---------------------|
| Karim (2016)          | yes                 | yes             | yes                            | yes                          | yes                            |                     |
| Karim (2018)          | yes                 | yes             | yes                            | yes                          | yes                            |                     |
| Kaye (2005a)          | yes                 | yes             | yes                            | yes                          | yes                            |                     |
| Kaye (2005b)          | yes                 | yes             | yes                            | yes                          | yes                            |                     |
| Kazaura (2016)        | yes                 | yes             | yes                            | yes                          | yes                            |                     |
| Kelly (2012)          | yes                 | yes             | yes                            | yes                          | yes                            |                     |
| Kelly (2018)          | yes                 | yes             | yes                            | yes                          | yes                            |                     |
| Kelly (2019)          | yes                 | yes             | yes                            | yes                          | yes                            |                     |
| Kenny (2019)          | yes                 | yes             | yes                            | yes                          | yes                            |                     |
| Khan (2002)           | yes                 | yes             | yes                            | yes                          | yes                            |                     |
| Kiernan (2016)        | yes                 | yes             | yes                            | yes                          | yes                            |                     |
| Kinyanda (2016)       | yes                 | yes             | yes                            | yes                          | yes                            |                     |
| Kiwuwa-Muyingo (2020) | yes                 | yes             | yes                            | yes                          | yes                            |                     |
| Klomegah (2008)       | yes                 | yes             | yes                            | yes                          | yes                            |                     |
| Koenig (2003)         | yes                 | yes             | yes                            | yes                          | yes                            |                     |
| Kohli (2015)          | yes                 | yes             | yes                            | yes                          | yes                            |                     |
| Kouyoumdjian (2013)   | yes                 | yes             | yes                            | yes                          | yes                            |                     |
| Kwagala (2013)        | yes                 | yes             | yes                            | yes                          | yes                            |                     |
| Kwiringira (2018)     | yes                 | yes             | yes                            | yes                          | yes                            |                     |
| Kyegombe (2014)       | yes                 | yes             | yes                            | yes                          | yes                            |                     |
| Laisser (2011)        | yes                 | yes             | yes                            | yes                          | yes                            |                     |



**Supplementary material:**

Risk factors for violence against women in high-prevalence settings: A mixed methods systematic review and meta-synthesis

| First author       | Aims and objectives | Research design | Process for producing findings | Data supports interpretation | Appropriate method of analysis | Additional comments |
|--------------------|---------------------|-----------------|--------------------------------|------------------------------|--------------------------------|---------------------|
| Laisser (2014)     | yes                 | yes             | yes                            | yes                          | yes                            |                     |
| Lary (2004)        | yes                 | yes             | yes                            | yes                          | yes                            |                     |
| Le Roux (2016)     | yes                 | yes             | yes                            | yes                          | yes                            |                     |
| Lim (2015)         | yes                 | yes             | yes                            | yes                          | yes                            |                     |
| Logie (2019)       | yes                 | yes             | yes                            | yes                          | yes                            |                     |
| Lundberg (2012)    | yes                 | yes             | yes                            | yes                          | yes                            |                     |
| Lundberg (2015)    | yes                 | yes             | yes                            | yes                          | yes                            |                     |
| MacLachlan (2009)  | yes                 | yes             | yes                            | yes                          | yes                            |                     |
| Malama (2019)      | yes                 | yes             | yes                            | yes                          | yes                            |                     |
| Manji (2020)       | yes                 | yes             | yes                            | yes                          | yes                            |                     |
| Mannell (2020)     | yes                 | yes             | yes                            | yes                          | yes                            |                     |
| McCloskey (2005)   | yes                 | yes             | yes                            | yes                          | yes                            |                     |
| McKelvie (2020)    | yes                 | yes             | yes                            | yes                          | yes                            |                     |
| Meekers (2013)     | yes                 | yes             | yes                            | yes                          | yes                            |                     |
| Messersmith (2017) | yes                 | yes             | yes                            | yes                          | yes                            |                     |
| Miller (2020)      | yes                 | yes             | yes                            | yes                          | yes                            |                     |
| Mootz (2017)       | yes                 | yes             | yes                            | yes                          | yes                            |                     |
| Mootz (2018)       | yes                 | yes             | yes                            | yes                          | yes                            |                     |
| Mulawa (2018a)     | yes                 | yes             | yes                            | yes                          | yes                            |                     |
| Mulawa (2018b)     | yes                 | yes             | yes                            | yes                          | yes                            |                     |
| Mulawa (2018c)     | yes                 | yes             | yes                            | yes                          | yes                            |                     |

**Supplementary material:**

Risk factors for violence against women in high-prevalence settings: A mixed methods systematic review and meta-synthesis

| First author        | Aims and objectives | Research design | Process for producing findings | Data supports interpretation | Appropriate method of analysis | Additional comments |
|---------------------|---------------------|-----------------|--------------------------------|------------------------------|--------------------------------|---------------------|
| Mullinax (2013)     | yes                 | yes             | yes                            | yes                          | yes                            |                     |
| Munro-Kramer (2018) | yes                 | yes             | yes                            | yes                          | yes                            |                     |
| Murray (2006)       | yes                 | yes             | yes                            | yes                          | yes                            |                     |
| Murray (2021)       | yes                 | yes             | yes                            | yes                          | yes                            |                     |
| Murshid (2016)      | yes                 | yes             | yes                            | yes                          | yes                            |                     |
| Murshid (2016)      | yes                 | yes             | yes                            | yes                          | yes                            |                     |
| Murshid (2017)      | yes                 | yes             | yes                            | yes                          | yes                            |                     |
| Murshid (2017)      | yes                 | yes             | yes                            | yes                          | yes                            |                     |
| Murshid (2018)      | yes                 | yes             | yes                            | yes                          | yes                            |                     |
| Namy (2017)         | yes                 | yes             | yes                            | yes                          | yes                            |                     |
| Nandi (2017)        | yes                 | yes             | yes                            | yes                          | yes                            |                     |
| Naved (2006)        | yes                 | yes             | yes                            | yes                          | yes                            |                     |
| Naved (2008)        | yes                 | yes             | yes                            | yes                          | yes                            |                     |
| Naved (2012)        | yes                 | yes             | yes                            | yes                          | yes                            |                     |
| Naved (2013)        | yes                 | yes             | yes                            | yes                          | yes                            |                     |
| Naved (2018)        | yes                 | yes             | yes                            | yes                          | yes                            |                     |
| Naved (2018)        | yes                 | yes             | yes                            | yes                          | yes                            |                     |
| Nimi (2020)         | yes                 | yes             | yes                            | yes                          | yes                            |                     |
| Nyato (2019)        | yes                 | yes             | yes                            | yes                          | yes                            |                     |
| Odimegwu (2018)     | yes                 | yes             | yes                            | yes                          | yes                            |                     |
| Ogland (2014)       | yes                 | yes             | yes                            | yes                          | yes                            |                     |

**Supplementary material:**

Risk factors for violence against women in high-prevalence settings: A mixed methods systematic review and meta-synthesis

| First author    | Aims and objectives | Research design | Process for producing findings | Data supports interpretation | Appropriate method of analysis | Additional comments |
|-----------------|---------------------|-----------------|--------------------------------|------------------------------|--------------------------------|---------------------|
| Okenwa (2010)   | yes                 | yes             | yes                            | yes                          | yes                            |                     |
| Osinde (2011)   | yes                 | yes             | yes                            | yes                          | yes                            |                     |
| Parmar (2012)   | yes                 | yes             | yes                            | yes                          | yes                            |                     |
| Pengpid (2018)  | yes                 | yes             | yes                            | yes                          | yes                            |                     |
| Peterman (2011) | yes                 | yes             | yes                            | yes                          | yes                            |                     |
| Prabhu (2011)   | yes                 | yes             | yes                            | yes                          | yes                            |                     |
| Qamar (2020)    | yes                 | yes             | yes                            | yes                          | yes                            |                     |
| Rahman (2011)   | yes                 | yes             | yes                            | yes                          | yes                            |                     |
| Rahman (2013)   | yes                 | yes             | yes                            | yes                          | yes                            |                     |
| Rahman (2014)   | yes                 | yes             | yes                            | yes                          | yes                            |                     |
| Rapp (2012)     | yes                 | yes             | yes                            | yes                          | yes                            |                     |
| Rees (2017)     | yes                 | yes             | yes                            | yes                          | yes                            |                     |
| Rees (2018)     | yes                 | yes             | yes                            | yes                          | yes                            |                     |
| Rees (2015)     | yes                 | yes             | yes                            | yes                          | yes                            |                     |
| Reese (2017)    | yes                 | yes             | yes                            | yes                          | yes                            |                     |
| Rehema (2016)   | yes                 | yes             | yes                            | yes                          | yes                            |                     |
| Reiss (2019)    | yes                 | yes             | yes                            | yes                          | yes                            |                     |
| Rezwana (2020)  | yes                 | yes             | yes                            | yes                          | yes                            |                     |
| Rustad (2016)   | yes                 | yes             | yes                            | yes                          | yes                            |                     |
| Sabri (2019)    | yes                 | yes             | yes                            | yes                          | yes                            |                     |
| Saile (2013)    | yes                 | yes             | yes                            | yes                          | yes                            |                     |

**Supplementary material:**

Risk factors for violence against women in high-prevalence settings: A mixed methods systematic review and meta-synthesis

| First author                                | Aims and objectives | Research design | Process for producing findings | Data supports interpretation | Appropriate method of analysis | Additional comments |
|---------------------------------------------|---------------------|-----------------|--------------------------------|------------------------------|--------------------------------|---------------------|
| Sambisa (2010)                              | yes                 | yes             | yes                            | yes                          | yes                            |                     |
| Sambisa (2011)                              | yes                 | yes             | yes                            | yes                          | yes                            |                     |
| Samuels (2015)                              | yes                 | yes             | yes                            | yes                          | yes                            |                     |
| Samuels (2019)                              | yes                 | yes             | yes                            | yes                          | yes                            |                     |
| Sanawar (2019)                              | yes                 | yes             | yes                            | yes                          | yes                            |                     |
| Schuler (2008)                              | yes                 | yes             | yes                            | yes                          | yes                            |                     |
| Schuler (2013)                              | yes                 | yes             | yes                            | yes                          | yes                            |                     |
| Schuler (2017)                              | yes                 | yes             | yes                            | yes                          | yes                            |                     |
| Schuler (2018a)                             | yes                 | yes             | yes                            | yes                          | yes                            |                     |
| Schuler (2018b)                             | yes                 | yes             | yes                            | yes                          | yes                            |                     |
| Schuler (2018)                              | yes                 | yes             | yes                            | yes                          | yes                            |                     |
| Schwitters (2015)                           | yes                 | yes             | yes                            | yes                          | yes                            |                     |
| Scolese (2020)                              | yes                 | yes             | yes                            | yes                          | yes                            |                     |
| Secretariat of the Pacific Community (2010) | yes                 | yes             | yes                            | yes                          | yes                            |                     |
| Semenza (2019)                              | yes                 | yes             | yes                            | yes                          | yes                            |                     |
| Shinabarger Reed (2008)                     | yes                 | yes             | yes                            | yes                          | yes                            |                     |
| Shuaib (2012)                               | yes                 | yes             | yes                            | yes                          | yes                            |                     |
| Sichimba (2020)                             | yes                 | yes             | yes                            | yes                          | yes                            |                     |
| Sigalla (2017)                              | yes                 | yes             | yes                            | yes                          | yes                            |                     |
| Sileo (2019)                                | yes                 | yes             | yes                            | yes                          | yes                            |                     |
| Silverman (2007)                            | yes                 | yes             | yes                            | yes                          | yes                            |                     |

**Supplementary material:**

Risk factors for violence against women in high-prevalence settings: A mixed methods systematic review and meta-synthesis

| First author                                                          | Aims and objectives | Research design | Process for producing findings | Data supports interpretation | Appropriate method of analysis | Additional comments |
|-----------------------------------------------------------------------|---------------------|-----------------|--------------------------------|------------------------------|--------------------------------|---------------------|
| Smith (2019)                                                          | yes                 | yes             | yes                            | yes                          | yes                            |                     |
| Solomon Islands Ministry of Women Youth and Children's Affairs (2008) | yes                 | yes             | yes                            | yes                          | yes                            |                     |
| Speizer (2010)                                                        | yes                 | yes             | yes                            | yes                          | yes                            |                     |
| Stake (2020)                                                          | yes                 | yes             | yes                            | yes                          | yes                            |                     |
| Stark (2019)                                                          | yes                 | yes             | yes                            | yes                          | yes                            |                     |
| Stieglitz (2011)                                                      | yes                 | yes             | yes                            | yes                          | yes                            |                     |
| Stieglitz (2018)                                                      | yes                 | yes             | yes                            | yes                          | yes                            |                     |
| Stiglitz (2012)                                                       | yes                 | yes             | yes                            | yes                          | yes                            |                     |
| Stöckl (2010)                                                         | yes                 | yes             | yes                            | yes                          | yes                            |                     |
| Stöckl (2014)                                                         | yes                 | yes             | yes                            | yes                          | yes                            |                     |
| Strønen (2016)                                                        | yes                 | yes             | yes                            | yes                          | yes                            |                     |
| Tanabe (2015)                                                         | yes                 | yes             | yes                            | yes                          | yes                            |                     |
| Tiruneh (2018)                                                        | yes                 | yes             | yes                            | yes                          | yes                            |                     |
| Tlapek (2015)                                                         | yes                 | yes             | yes                            | yes                          | yes                            |                     |
| Tumwesigye (2012)                                                     | yes                 | yes             | yes                            | yes                          | yes                            |                     |
| Valentine (2019)                                                      | yes                 | yes             | yes                            | yes                          | yes                            |                     |
| VanderEnde (2015)                                                     | yes                 | yes             | yes                            | yes                          | yes                            |                     |
| Vanuatu National Statistics Office (2011)                             | yes                 | yes             | yes                            | yes                          | yes                            |                     |
| Vyas (2014)                                                           | yes                 | yes             | yes                            | yes                          | yes                            |                     |
| Vyas (2015a)                                                          | yes                 | yes             | yes                            | yes                          | yes                            |                     |
| Vyas (2015b)                                                          | yes                 | yes             | yes                            | yes                          | yes                            |                     |

**Supplementary material:**

Risk factors for violence against women in high-prevalence settings: A mixed methods systematic review and meta-synthesis

| First author      | Aims and objectives | Research design | Process for producing findings | Data supports interpretation | Appropriate method of analysis | Additional comments |
|-------------------|---------------------|-----------------|--------------------------------|------------------------------|--------------------------------|---------------------|
| Vyas (2016)       | yes                 | yes             | yes                            | yes                          | yes                            |                     |
| Vyas (2018)       | yes                 | yes             | yes                            | yes                          | yes                            |                     |
| Wadji (2020)      | yes                 | yes             | yes                            | yes                          | yes                            |                     |
| Wandera (2015)    | yes                 | yes             | yes                            | yes                          | yes                            |                     |
| Wilson (2019)     | yes                 | yes             | yes                            | yes                          | yes                            |                     |
| Yaya (2019a)      | yes                 | yes             | yes                            | yes                          | yes                            |                     |
| Yaya (2019b)      | yes                 | yes             | yes                            | yes                          | yes                            |                     |
| Young (2018)      | yes                 | yes             | yes                            | yes                          | yes                            |                     |
| Yount (2016)      | yes                 | yes             | yes                            | yes                          | yes                            |                     |
| Yount (2018a)     | yes                 | yes             | yes                            | yes                          | yes                            |                     |
| Yount (2018b)     | yes                 | yes             | yes                            | yes                          | yes                            |                     |
| Zablotska (2009)  | yes                 | yes             | yes                            | yes                          | yes                            |                     |
| Zegenhagen (2019) | yes                 | yes             | yes                            | yes                          | yes                            |                     |
